1 **Contrasting patterns of foraging behavior in Neotropical stingless bees using pollen and**  
2 **honey metabarcoding**

3

4 Aline C. Martins<sup>1,2\*</sup>, Carolyn E. B. Proença<sup>3</sup>, Thais N. C. Vasconcelos<sup>2</sup>, Antonio J. C. Aguiar<sup>4</sup>,  
5 Hannah C. Farinasso<sup>4</sup>, Aluisio T. F. de Lima<sup>3</sup>, Jair E. Q. Faria<sup>3</sup>, Krissy Norrana<sup>4</sup>, Marcella B. R.  
6 Costa<sup>5</sup>, Matheus M. Carvalho<sup>4,6</sup>, Rodrigo L. Dias<sup>5</sup>, Mercedes M. C. Bustamante<sup>1</sup>, Fernanda A.  
7 Carvalho<sup>5</sup>, Alexander Keller<sup>7</sup>

8

- 9 1. Departamento de Ecologia, Universidade de Brasília, Brasília, DF, 70910-900, Brazil  
10 2. Department of Ecology and Evolutionary Biology, University of Michigan, Ann Arbor MI  
11 48109, US  
12 3. Departamento de Botânica, Universidade de Brasília, Brasília, DF, 70910-900, Brazil  
13 4. Laboratório de Abelhas, Departamento de Zoologia, Universidade de Brasília, Brasília, DF,  
14 70910-900, Brazil  
15 5. Departamento de Genética, Ecologia e Evolução, Universidade Federal de Minas Gerais,  
16 Belo Horizonte, MG, 31270-901, Brazil  
17 6. Laboratório de Biologia Comparada e Abelhas, Departamento de Biologia, Faculdade de  
18 Filosofia, Ciências e Letras de Ribeirão Preto, Universidade de São Paulo, Ribeirão Preto,  
19 SP, 14040-901, Brazil  
20 7. Cellular and Organismic Networks, Faculty of Biology, Ludwig-Maximilians University,  
21 82152, München, Germany

22

23 *\*Corresponding author: martinsalinec@gmail.com*

24

25

26 **Abstract**

27

28 Stingless bees are major flower visitors in the tropics, but their foraging preferences and behavior  
29 are still poorly understood. Studying stingless bee interactions with angiosperms is  
30 methodologically challenging due to the high tropical plant diversity and inaccessibility of upper  
31 canopy flowers in forested habitats. Pollen DNA metabarcoding offers an opportunity of assessing  
32 floral visitation efficiently and was applied here to understand stingless bee floral resources spectra  
33 and foraging behavior. We analyzed pollen and honey of three distantly related species of stingless  
34 bees, with different body size and social behavior: *Melipona rufiventris*, *Scaptotrigona postica* and  
35 *Tetragonisca angustula*. Simultaneously, we evaluate the local floristic components through seventeen  
36 rapid botanical surveys conducted at different distances from the nests. We discovered a broad set  
37 of explored floral sources, with 46.3 plant species per bee species in honey samples and 53.67 in  
38 pollen samples. Plant families Myrtaceae, Asteraceae, Euphorbiaceae, Melastomataceae and  
39 Malpighiaceae dominated the records, indicating stingless bee preferences for abundant resources  
40 that flowers of these families provide in the region. Results also reinforce the preference of  
41 stingless bees for forest trees, even if only available at long distances. Our high-resolution results  
42 encourage future bee-plant studies using pollen and honey metabarcoding in hyper diverse tropical  
43 environments.

44

45

46

47

48



49 **Introduction**

50 Plant-pollinator interactions mediate most flowering plant reproduction, maintaining terrestrial  
51 ecosystems and crops<sup>1</sup>. The current decline in pollinator abundance and diversity worldwide  
52 threatens pollination services, with direct consequences to nature conservation and food security<sup>2</sup>.  
53 Therefore, understanding the interaction between pollinators and flowering plants became crucial,  
54 since it can provide an information framework to subsidize conservation policies and decisions in a  
55 changing world. The most important group of animal pollinators – the bees – totally depend on  
56 floral resources to complete their life cycles<sup>3</sup>, while 87.5% of the animal-pollinated flowering plants  
57 depend on bees to reproduce<sup>4</sup>. Interaction between bees and angiosperms has been a major  
58 research focus in the last two decades, due to the massive effects of insect and bee declines<sup>5</sup>  
59 threatening ecosystem services and food security<sup>6,7</sup>. In this context, pollen, and honey DNA  
60 metabarcoding emerged as an efficient technique to identify plant taxa visited by pollinators based  
61 on samples extracted from bees' bodies or nests<sup>8–11</sup>. DNA metabarcoding of pollen and honey has  
62 been largely applied to temperate systems, and recently to (sub) tropical species of stingless  
63 bees<sup>12,13</sup>.

64 The stingless bees (Apidae, tribe Meliponini) comprise c. 500 species of eusocial bees, most  
65 of which occur in tropical America (more than 400 species), but also in Africa, Asia and  
66 Australia<sup>3,14</sup>. The role of stingless bees as pollinators of the neotropical flora could become even  
67 more relevant under climate change scenarios, if the predicted expansion of warmer temperatures  
68 pushes the distribution of predominantly temperate bees, such as *Apis* and *Bombus*, into cooler  
69 regions<sup>6,15</sup>. Although domestication is still restricted to a few species, stingless bees are also  
70 explored commercially for honey production<sup>16</sup>, which can reduce the use of introduced honey-  
71 bees and their impact on native species in these regions<sup>12</sup>

72 As all social bees, stingless bees show a predominantly generalist pattern of floral  
73 exploitation, i.e. they visit a large number of species in several plant families, supposedly

74 disregarding specific floral traits<sup>17</sup>. Particularities exist though, since stingless bees exhibit a huge  
75 diversity of body size (1.8 to 13.5 mm)<sup>3</sup> flight distance (0.3 to 3 km)<sup>18</sup> and foraging behavior<sup>19</sup>.  
76 However, the breadth of the stingless bees diet – that is, how many different species of flowering  
77 plant they forage on – and the extent of their role as pollinators of tropical plants - are still largely  
78 open questions. Most studies aiming to answer some of these questions faced some  
79 methodological difficulties due to inaccessibility of visited flowers, which mostly occupy upper  
80 canopy strata, especially in rainforests<sup>20</sup>, and hyper diversity of tropical plants, thus hampering easy  
81 identification through bee-pollen morphology<sup>21,22</sup>.

82 In this study, we explored the diet breadth of three distantly related species of stingless  
83 bees of different body sizes and flight ranges in a hyper-diverse tropical ecosystem, the Cerrado  
84 savannas of central South America. The Cerrado is the most species-rich savanna in the world and  
85 a hotspot of biodiversity<sup>23</sup>; the flora encompasses >13,000 native species<sup>24</sup> a highly patchy  
86 vegetation with several different physiognomies, ranging from grasslands, marshlands, and typical  
87 savanna to closed canopy riverine forests along waterways<sup>25</sup>. The proportion of pollinator-  
88 dependent species in the Cerrado flora is still unknown, although this number is likely to be similar  
89 to that of tropical forests<sup>4</sup>, with some authors estimating c. 60% of angiosperm species being bee  
90 dependent<sup>26</sup>.

91 We analyzed pollen and honey from the pots of the nests (henceforward pot-pollen and  
92 pot-honey respectively) from three commonly managed stingless bee species (*Melipona rufiventris*,  
93 *Scaptotrigona postica* and *Tetragonisca angustula*) native to the Cerrado to investigate: (i) How broad is  
94 the floral resource exploitation of stingless bees in a hyper-diverse flora? (ii) Which plant species  
95 and families are the most important sources of pollen and/or nectar for stingless bees in the area?  
96 (iii) What can pollen and honey metabarcoding reveal, when combined with floristic surveys of the  
97 area, about stingless bees foraging behavior, particularly foraging distances, and floral preferences?  
98 We also discuss how efficiently pollen and honey metabarcoding identified plants visited by bees in

99 the area, considering the low DNA sequence coverage of neotropical plant species in public  
100 databases<sup>27</sup>, and the potential role of this technique in improving ecological understanding of bee-  
101 plant interactions in the tropics.

102

### 103 **Material and Methods**

#### 104 *Study site*

105 Our study was conducted in the Ecological Reserve of the Brazilian Institute of Geography  
106 and Statistics (IBGE) (15°56'41" S and 47°53'07" W) that, together with the contiguous Brasília  
107 Botanic Garden and the University of Brasília Experimental Field Station, preserves an area of c.  
108 10,000 ha of native Cerrado in the Distrito Federal, Brazil. The IBGE reserve was chosen as a  
109 study site for being one of the most well-studied areas of Cerrado, with good prospects of building  
110 a relatively robust plant DNA reference library, a requirement for our analyses (see below); it  
111 occupies a central position within the Cerrado Biome. The climate in the area is typical tropical  
112 savanna climate (Aw Köppen classification system) with dry winters and rainy summers with an  
113 average annual precipitation of 1453 mm, altitude ranges from 1048 to 1160 m. The IBGE reserve  
114 contains the main vegetation types typical of the Cerrado domain: savannas (*cerrado sensu stricto*),  
115 palm swamps (*veredas*), grasslands (*campo limpo* and *campo sujo*) and riverine forests (*mata de galeria*),  
116 surrounded by natural and agricultural areas (Figure 1). This habitat heterogeneity results in high  
117 plant biodiversity. The last published floristic survey in the area recorded 1798 species of  
118 angiosperms, of which 1457 are native, distributed in 138 families and 724 genera<sup>28</sup>.

119

#### 120 *Stingless bee species and nest material sampling*

121 Three native species of stingless bees were chosen for our study: *Melipona rufiventris*,  
122 *Scaptotrigona postica* and *Tetragonisca angustula*. Choice of species was guided by three key aspects:  
123 body size, differences in foraging behavior, and phylogenetic relationships. *Melipona rufiventris* is the  
124 largest with a body length of c. 9.5 mm, *S. postica* has an intermediate body size varying from 5.7 to  
125 6 mm, and *T. angustula* is amongst the smallest stingless bees with a total body length of c. 4 mm.  
126 Phylogenetically, the three genera are not closely related, i.e. they are not sister groups<sup>29</sup>. *Melipona*  
127 *rufiventris* is typically found in the more open vegetation types of eastern and central Brazil,  
128 *Scaptotrigona postica* occurs in a broader region in Central, Northeast and southeast Brazil, also  
129 associated with open vegetation, while *Tetragonisca angustula* is widespread in the Neotropics  
130 (Mexico to South America)<sup>14</sup>.

131 The three species are commonly managed by local beekeepers and were chosen also for  
132 their relatively easy management in artificial colonies (Figure S1). The decision to use artificial  
133 colonies for sampling in our study relied on four main points: 1. to preserve the natural bee  
134 community in the area, not destroying any nests for sampling; 2. to facilitate sampling, as pollen  
135 and honey are stored in accessible compartments in the wooden box; 3. to facilitate the access to  
136 the colonies, which in natural conditions would be randomly distributed, depending on availability  
137 of cavities, and 4. to make sure nests would have a strong population and enough pot-pollen and  
138 pot-honey for sampling. Eighteen pre-established nests were installed: three of *M. rufiventris*, eight  
139 of *S. postica* and seven of *T. angustula*. The nests were installed at a distance of about 5 m from each  
140 other and c. 150 cm above ground level, in typical savanna or *cerrado sensu stricto*<sup>28</sup> where most  
141 species are subshrubs, shrubs or small trees.

142 Nests were moved to the study area eight weeks prior to the first sampling to allow bees  
143 time to start accumulating pollen and honey from local species in the artificial nests. Pot-pollen  
144 and pot-honey samples were collected from the nests (Figure S3) once every 15 days for five  
145 months (July 2019 – November 2019). This period started at the height of the dry season, moved

146 through the transition between dry and wet seasons and ended at the beginning of the wet season.  
147 Samples were always collected from new pots – that is, those built in between two subsequent  
148 sampling events. Micropipettes (1000 uL) were used to collect honey from the pots, while pollen  
149 was collected with plastic straws, which perforates the pollen mass while collecting it at the same  
150 time. Samples were subsequently stored in falcon tubes and stored in a -20° C freezer until  
151 extraction. In total, 191 samples (115 of pollen and 75 of honey) were collected from the three  
152 species: 29 of *M. rufiventris*, 81 of *S. postica* and 74 of *T. angustula*

153

#### 154 *Metabarcoding protocol*

155 Extractions of DNA of pollen samples from pot-pollen and pot-honey follow different  
156 methodologies, due to the different natures of the samples. For pot-honey, we extracted DNA  
157 using the Machery-Nagel (Düren, Germany) NucleoSpin Food Kit; for pot-pollen we used the  
158 Machery-Nagel (Düren, Germany) NucleoSpin Plant II.

159 *Pot-Pollen DNA extraction* – To extract pollen genomic DNA, we added to the pooled  
160 samples (weight ranging from 0.1 g to 2 g) 4 mL of deionized and autoclaved water, and  
161 homogenized it using a vortex. We then placed 200 µL of this emulsion in a 1.5mL  
162 microcentrifuge tube, and centrifuged it for 15 minutes at 8000 rpm. We discarded the supernatant  
163 material, froze the pellet obtained in liquid nitrogen, and then used mortar and pestle to break the  
164 pollen exine and the NucleoSpin Plant II Kit to promote cell lysis and to isolate the DNA  
165 according to the manufacturer's instructions.

166 *Pot-Honey DNA extraction* – To extract pollen genomic DNA from honey, we added  
167 deionized and autoclaved water to the samples until the volume of each sample tube reached 1.5  
168 mL. We incubated the tubes at 65 °C for 30 min and, over that period, inverted the tubes slowly  
169 to homogenize the material. We then pooled the honey samples collected from the same nest and

170 the same day by pouring them into falcon tubes, to which deionized and autoclaved water was  
171 added until completing 10 mL. Afterwards, we centrifuged these pooled samples for 15 min at  
172 5000 rpm and discarded the supernatant material. Each precipitated pooled honey sample was  
173 resuspended in 200  $\mu$ L deionized and autoclaved water and placed in a 1.5-mL microcentrifuge  
174 tube. This procedure was done twice. Finally, we centrifuged the samples for 15 min at 5000 rpm,  
175 discarded the supernatant material, dried the pellet in a drying cabinet at 35°C, and then ground  
176 the samples inside the microcentrifuge tube using micro-pestles and liquid nitrogen. We then used  
177 the NucleoSpin Food Kit to promote cell lysis and to isolate the DNA according to the  
178 manufacturer's instructions.

179 The protocol of amplification utilizes a dual-indexing strategy<sup>9</sup> to amplify the ITS2 region,  
180 using the primers ITS-S2F and ITS4R. Primer sequences, references and other amplification  
181 methodological details can be found in<sup>9</sup> and<sup>30</sup>. The triplicate PCR reactions were combined per  
182 samples, well mixed and checked on 1% agarose gel using 5  $\mu$ L of the combined products for  
183 quality. PCR products of each sample were normalized to ensure more equalized library sizes using  
184 the SequalPrep Normalisation kit (Invitrogen, CA, USA) according to the manufacturer's protocol.  
185 The multiplex-index samples were pooled and then submitted to quality control and quantification  
186 to ensure the correct fragment size has been amplified with a Bioanalyzer High Sensitivity DNA  
187 Chip (Agilent Technologies, CA, USA) and a dsDNA High Sensitivity Assay on the Qubit  
188 Fluorometer. For library dilution, we followed the Illumina Sample Preparation Guide for a 2 nM  
189 library and a 5% PhiX control was added in order to increase quality. In addition, the reagent  
190 cassette of the sequencing kit was spiked with the Read1, Read 2 and index primers according to  
191 Sickel et al. (2015). Sequencing was then performed on the Illumina MiSeq system at the University  
192 of Würzburg. Sequence data are available at NCBI (Bioproject 976708).

193

194 *Bioinformatic data analyses*

195 We used VSEARCH v2.14.2<sup>31</sup> to join paired ends of forward and reverse reads and to  
196 remove reads shorter than 150bp, quality filtering ( $EE < 1$ )<sup>32</sup>, *de-novo* chimera filtering (following  
197 UCHIME3)<sup>33</sup>, and determination of amplicon sequence variants (ASVs)<sup>33</sup>, as previously done for  
198 pollen metabarcoding networks<sup>12</sup>. Reads were first directly mapped iteratively with global  
199 alignments using VSEARCH against several floral ITS2 reference databases for the study region  
200 and an identity cut-off threshold of 97%. A reference library of ITS2 sequences of all plant species  
201 recorded from IBGE was built from sequences available on GenBank. This primary database was  
202 then curated to remove voucherless entries for greater trustworthiness. Remaining unclassified  
203 sequences were then tracked by iterative searches against geographically broadening public  
204 sequence reference data, i.e., species lists of the flora of the Distrito Federal, then the large,  
205 neighboring state of Goiás, and lastly the entire Cerrado biome flora to increase completeness of  
206 reads. These reference databases were created with the BCdatabaser<sup>34</sup> from GenBank entries given  
207 above mentioned species lists and default parameters (length between 200 and 2000 bp, maximum  
208 nine sequences per species). For still unclassified reads, we used SINTAX<sup>35</sup> to assign taxonomic  
209 levels as deep as possible using a global reference database<sup>36</sup>. After classification, we performed  
210 plausibility checks according to geolocation and phenology with the results to verify validity.  
211 Thirteen species were automatically matched to genus level only but were attributed to species  
212 based on being the only species of the genus to occur in the Distrito Federal.

213

#### 214 *Floristic surveys and vegetation characterization*

215 To improve our knowledge of the flora surrounding the nests, we conducted Rapid  
216 Botanical Surveys (RBS) in small plots that were demarcated *in loco* as homogeneous to vegetation  
217 type. These plots were exhaustively surveyed for all flowering plant species of all life forms, fertile  
218 or not, by a team of 3-5 researchers, where one was the booker, i.e. the most experienced person in

219 the group, who identified the plants in the field and discarded duplicated species; other team  
220 member collected and pressed the vouchers (for additional methodological details see<sup>37</sup>.

221       Eleven RBS plots had been initially chosen to correspond to one plot near the nests  
222 (henceforward nest plot) and ten other plots established at the vertices of two pentagons; the inner  
223 pentagon was established with its vertices at 700m from the nests and the outer pentagon with  
224 vertices at 1500m from the nests. These distances were chosen based on the literature of the flight  
225 capabilities of other stingless bees<sup>18</sup>. These eleven RBS plots mostly fell in areas of well-preserved  
226 savanna within the IBGE Reserve, ranging from the more open, grass and herb-rich areas with few  
227 shrubs and trees (*campo sujo*), to dense savanna woodland (*cerradão*); one outer pentagon plot fell in  
228 disturbed *cerrado* and another in heavily degraded secondary vegetation out of the IBGE. Because  
229 none of the plots fell in riverine gallery forest, we included six additional RBS plots in this  
230 vegetation type: three in the riverine gallery forest nearest to the nests (Nascente do Roncador, c.  
231 630m from the nests), and three in a more distant gallery forest (Ponte do Corujão, c. 2070m from  
232 the nests), measured as the crow flies, thus a total of 17 RBS plots. Lastly, we also surveyed the  
233 plants and weeds growing in the ornamental gardens associated with the Main Building and Seat of  
234 the Reserva Ecológica do IBGE, which is located c. 650m from the nests. All specimens collected  
235 in RBS inventories were deposited in the UB Herbarium (University of Brasília) and the records  
236 are available online in the Species Link Network (<https://specieslink.net/search/>) by searching on  
237 the collector name "Projeto Barcode Cerrado".

238

### 239 *Data Integration*

240       The 30 most abundant plant species in the pollen and honey samples were classified by  
241 ubiquity (i.e., presence in pollen or honey samples of two or all bee species). We then crossed this  
242 information with data from the RBS floristic surveys: distance from the nests: i.e., if they were  
243 sampled at nest plot, inner pentagon plots, outer pentagon plots, nearest or furthest gallery forest



244 plots, or the gardens. These 30 species were also characterized from the literature in terms of their  
245 offered resources (e.g. pollen, nectar, oil, resin), their habitat (savanna, forest or cultivated/weedy)  
246 and habit (trees, shrubs, subshrubs, hemiparasites) (Table 1).

247

#### 248 *Statistical analysis of pollen and honey samples*

249 Data was processed for analyses using R 4.2.2<sup>38</sup> and the packages phyloseq<sup>39</sup> vegan<sup>40</sup>,  
250 bipartite<sup>41</sup>, circlize<sup>42</sup> and viridis<sup>43</sup>. In R, non-plant sequences were removed from the dataset, as well  
251 as the data transformed to relative read abundances (RRAs) per sample. ASVs that were classified  
252 as the same plant species were accumulated at the species level. Low abundance taxa that  
253 contributed less than 1% to a sample were removed from those samples. The Shannon diversity  
254 index was calculated for each sample (pollen and honey) from each bee species. The diversity was  
255 tested for significant differences between stingless bee species using the Kruskal-Wallis test,  
256 separately for pollen and honey samples. We also performed an NMDS ordination to visualize  
257 clustering of samples of pollen and nectar using Bray-Curtis beta-diversity dissimilarities. The  
258 ordination represented by proximity of points shows how similar two samples are in terms of  
259 composition and abundance of taxa. We tested for differences between species by using a  
260 PERMANOVA, separately for honey and pollen samples. We further calculated network indices  
261 of the three stingless bee species to account for their overlap and complementarity in the visited  
262 plant resources, i.e. the  $d'$  for each bee species and  $H2'$  for the entire network.

## 263 **Results**

264 Pollen and honey metabarcoding yielded a total of 5,079,123 quality filtered reads, with  
265 mean throughput per sample of 27307.11 reads +/- 1756.635 (SE). Significant reads (more than  
266 1% of reads in any sampling) accounted for 110 ASVs, in 86 genera and 40 plant families; c. 36%  
267 of these reads were only matched to generic level or above. In total, 95 out of the 110 ASVs

268 recovered from the samples had been previously recorded in the IBGE Reserve flora<sup>28</sup>; 12 of the  
269 15 absent taxa were exotic cultivated or weedy species. A detailed list of all significant plant species  
270 present in pot-pollen and pot-honey samples is available in Table S2. Reads below the threshold  
271 value (190 ASVs) still showed a high number of matches to species known to occur in IBGE (86  
272 species, c. 45%) of which 41 were also recorded by us in the RBS floristic inventories.

273

#### 274 *How broad is the floral resource exploitation by stingless bees in Cerrado Savanna?*

275 Overall, the interaction network was highly generalized ( $H2' = 0.2895575$ ), and  
276 consequently also that of the three species within the network (*Melipona rufiventris*  $d' = 0.22$ ,  
277 *Scaptotrigona postica*  $d' = 0.04$ , and *Tetragonisca angustula*  $d' = 0.22$ ) (Figure 2). More than a half of  
278 plant species appeared in the samples of at least two of the bee species. In terms of relative plant  
279 species abundances as evaluated by combined honey plus pollen samples, bees showed an  
280 opportunistic foraging pattern, with most plant species with low abundance and a few highly  
281 abundant.

282

#### 283 *Differences among pattern of floral sources exploitation of bee species*

284 The comparison between alpha diversity among samples of different bee species showed  
285 that the plant species richness in the pot-honey was higher than in the pot-pollen for all species,  
286 but the difference was only significant for *M. rufiventris* (Figure 3). In a comparison among the three  
287 bee species, Shannon diversity of plant species in pollen samples was not significantly different  
288 between bee species (Kruskal-Wallis rank sum test, chi-squared = 1.4733,  $df = 2$ ,  $p$ -value > 0.05),  
289 neither was plant species richness (Kruskal-Wallis rank sum test, chi-squared = 4.5138,  $df = 2$ ,  $p$ -  
290 value > 0.05). The same applied for honey samples with Shannon diversity (Kruskal-Wallis rank  
291 sum test, chi-squared = 2.6469,  $df = 2$ ,  $p$ -value > 0.05) and species richness (Kruskal-Wallis rank  
292 sum test, chi-squared = 4.9389,  $df = 2$ ,  $p$ -value > 0.05).

293 Although the most frequent plant species are shared among the three stingless bee species,  
294 samples from different bee species have several compositional particularities, as shown by the  
295 NMDS (Figure 4). The NMDS showed the composition of plants collected differed strongly  
296 between bee species, both for pollen (PERMANOVA,  $df = 2$ ,  $R^2 = 0.12516$ ,  $F = 7.2246$ ,  $p <$   
297  $0.001^{***}$ ) and honey (PERMANOVA,  $df = 2$ ,  $R^2 = 0.10751$ ,  $F = 3.8548$ ,  $p < 0.001^{***}$ ). The  
298 NMDS also points to different plant species composition between samples of three species, but in  
299 the honey samples little ordination is observed (Fig. 4A). Among pollen samples, on the other  
300 hand, we can observe different patterns among the three species, with more overlap between *M.*  
301 *rufiventris* and *S. postica* (Fig. 4B).

302

#### 303 *Most frequent plant species and families recovered from pot-pollen and pot-honey samples*

304 The 30 ubiquitously found plant species in pot-honey and pot-pollen samples belong to the  
305 following families: Myrtaceae, Loranthaceae, Anacardiaceae, Phyllanthaceae, Sapindaceae,  
306 Melastomataceae, Euphorbiaceae, Primulaceae, Nyctaginaceae, Rosaceae, Asteraceae,  
307 Malpighiaceae, Cloranthaceae, Piperaceae, Fabaceae, and Clusiaceae (Figure 5, Table S3). Out of  
308 110 ASVs, some plant taxa stand out as most frequent in samples of all the three bee species:  
309 Myrtaceae: *Syzygium cumini*, *Myrcia linearifolia* and *Myrcia pinifolia*; Loranthaceae:  
310 *Struthanthus/Psittacanthus*, Anacardiaceae: *Tapirira guianensis*, Phyllanthaceae: *Richeria grandis*,  
311 Sapindaceae: *Matayba guianensis*, and Melastomataceae: *Miconia stenostachya*. Most of them offer  
312 pollen and nectar, except the pollen-only *Miconia* and the two *Myrcia* species. Thirteen of these  
313 ubiquitous species were nectar or oil flowers (i.e., they provide additional resources beyond pollen).  
314 Five highly abundant reads were incompletely matched, i.e. could not be identified to species level  
315 (*Eucalyptus* sp., Myrtaceae sp., *Myrsine* sp., *Croton* sp, *Struthanthus/Psittacanthus*) but *Croton*, *Eucalyptus*  
316 *Psittacanthus* and *Struthanthus* are known to produce floral nectar. Pollen-only flowers were found in  
317 honey samples of all three species: *Myrsine* sp, *Blepharocalyx salicifolius*, *Piper aduncum*, *Miconia*

318 *leucocarpa* and several *Myrcia* species, thus indicating some kind of mixing nectar and pollen trips,  
319 manipulation or spill-over inside the nests. Pollen records include similar diversity numbers of  
320 pollen-only flowers and flowers offering nectar and pollen. Only four of out of the 110 ASVs were  
321 not recorded in our RBSs: *Baccharis dracunculifolia* and *Myrcia pinifolia*, both native Cerrado species  
322 that occur in the IBGE, and exotic *Eucalyptus sp. Toxicodendron succedaneum*.

323         These 30 most abundant plant species had the following characteristics: all were woody  
324 perennials, and most were trees or large shrubs (one climber and one hemiparasite). They could be  
325 grouped into two dominant groups according to a combination of the habitat and floral resources.  
326 *Group 1* is composed of riverine forest species that offer pollen and nectar, recorded as very  
327 common in the Forest RBS surveys: *Syzygium cumini*, *Tapira guianensis*, *Richeiria grandis*, *Matayba*  
328 *guianensis*, *R. urticifolius*. *Group 2* includes Cerrado shrubs or trees offering only pollen and recorded  
329 as common around the nests, in the Cerrado RBS surveys: *Myrcia linearifolia*, *Blepharocalyx salicifolius*,  
330 *Maprounea guianensis*.

### 331 **Discussion**

332         Pollen and honey metabarcoding of three stingless bee species in the genus *Melipona*,  
333 *Scaptotrigona* and *Tetragonisca* revealed a broad generalized set of used floral sources regarding  
334 number of species and plant families explored. We recovered 110 plant species in pot-honey and  
335 pot-pollen retrieved from nests of three stingless bee species. This reveals a broader spectrum of  
336 food sources than found by previous surveys on neotropical stingless bees that relied on non-  
337 DNA based methods such as field observations, field collections, and palynological studies. For  
338 instance, non-DNA based studies in another hyper diverse area in the Neotropics, the Amazon,  
339 revealed from 80 to 122 pollen types in nests and pollen loads of 10-15 species of stingless bees<sup>44</sup>.  
340 Other similar studies in species-rich areas of the Neotropics show comparatively lower numbers<sup>22</sup>.  
341 While these studies recorded a maximum of five to eight plant species per bee species, we found a

342 mean of 46.3 plant species per bee species in honey samples and 53.67 in pollen samples. The  
343 interaction network and high number of species found in honey and pollen of the three analyzed  
344 stingless bee species point to a generalist foraging behavior, known to be common in eusocial bees  
345 and in stingless bees in particular<sup>17,20</sup>. It also points to probable scouting investigative trips,  
346 followed by heavy recruitment and opportunistic behavior when a high-quality resource is located,  
347 with most plant species with low abundance and a few highly abundant. Note that our results may  
348 still be an underestimation, since samples were collected during only 6 months, i.e., did not include  
349 all seasons.

350         The power of pollen DNA metabarcoding in revealing broad food sources for stingless  
351 bees had only been demonstrated before in Southeast Asia and Australia. In Sumatra, a study of  
352 *Tetragonula laeviceps* using pollen metabarcoding coupled with light microscopy revealed 99 plant  
353 species<sup>45</sup>. Similarly, a study with *Tetragonula carbonaria* in Queensland retrieved 302 plant species in  
354 pollen samples across seven sites at different seasons of the year over a two-year period<sup>13</sup>. These  
355 are promising results, especially when considering expanding this technique to tropical and  
356 subtropical forests of the Neotropics. Studies of pollination and floral biology in these habitats is  
357 often very difficult because the plants are scattered, flowers are difficult to reach, and often in the  
358 upper canopy. Therefore, direct observations of bees on flowers in tropical and subtropical forests  
359 are rare<sup>20</sup>, and records of stingless bee – flower interaction in these environments became almost  
360 restricted to pollen loads or pot pollen analyses<sup>22</sup>. Although their utility is undeniable<sup>46</sup>,  
361 morphological identification of pollen may become obsolete for pollination biology studies when  
362 compared with the efficiency of DNA metabarcoding to identify different plant species in  
363 extremely rich floras.

364         Pollen analyses via DNA metabarcoding also have the advantage of revealing unexpected  
365 food sources used by bees that would perhaps be unnoticed in studies using other methodologies.  
366 For instance, our analyses revealed that DNA from 13 wind-pollinated plant species were found

367 among the 50 most abundant species in the sample of the three species, including monocots  
368 (Poaceae, Cyperaceae), eudicots (Euphorbiaceae: *Acalypha*, Amaranthaceae: *Amaranthus*, Urticaceae:  
369 *Cecropia*, Cannabaceae: *Trema*), and a conifer genus, the introduced *Pinus* (Table S2). The presence  
370 of non-melittophyllous angiosperms and gymnosperms is relatively common in melisso-  
371 palynological studies: Cyperaceae, Poaceae, Taxaceae and Pinaceae<sup>22,45,47</sup>. Despite previous studies  
372 demonstrating that pollen from anemophilous species might be a contamination in melisso-  
373 palynological samples<sup>48</sup>, bees are regularly reported visiting such taxa<sup>49,50</sup>. Our results confirm  
374 active collection of pollen from anemophilous species, since their abundance in our analyzed  
375 samples is relatively high. One of the most abundant plant species in the pollen analysis was  
376 *Hedyosmum brasiliense* (Chloranthaceae), widely cited in the literature as wind-pollinated<sup>51</sup>. This  
377 species was not only recorded in the pollen samples of all three species of bees, but was amongst  
378 the 10 most abundant records for *Tetragonisca angustula* in our results. These results reinforce the  
379 theory that anemophilous plants, which account for 10% of angiosperms and most gymnosperms,  
380 produce enough pollen<sup>52</sup> to be attractive to social bees, under certain conditions of colony size and  
381 food demands. However, the role of bees and other insects as true pollinators of anemophilous  
382 plants remains unresolved, in spite of the importance of wind-pollinated crops<sup>53</sup> and of the several  
383 records showing that anemophilous plant pollen is important for several bee species (see  
384 references above).

385         A surprising and novel observation is the significant amount of Marchanthiophyte DNA  
386 from the liverwort *Dumortiera hirsuta* found in pot pollen from the three studied stingless bee  
387 species (Table S2). Future research would need to seek evidence if the DNA results from the  
388 collection of spores or perhaps some chemical compounds from liverworts by stingless bees. Bees  
389 collecting spores from fungi and plants is not a novelty, as there is evidence of active collecting<sup>54</sup> as  
390 well as records of spores in samples of pollen and honey<sup>55</sup>. In lieu of pollen, spores supposedly

391 have nutritional benefits<sup>56</sup>. Stingless bees might also visit liverworts to collect lipidic compounds,  
392 e.g. terpenoids used in communication among individuals<sup>57</sup> commonly occurring in liverworts<sup>58</sup>.

393 The high degree of overlap between plant profiles found in the honey of the three bee  
394 species suggests that bees may be competing for the same nectar resources. Pollen plant profiles  
395 on the other hand showed far less overlap between species, corroborating evidence that pollen  
396 exploitation and digestion requires a high degree of specialization<sup>59</sup>, even in generalist bees<sup>60</sup>, which  
397 is often facilitated by each species' microbiome<sup>61</sup>. Although some plant species appeared in the  
398 samples of all three bee species, *Scaptotrigona postica* and *M. rufiventris* shared more species while *T.*  
399 *angustula* differed from both. Considering body size vs. flower matching, the smallest species, *T.*  
400 *angustula*, visits the highest number of species of the three, potentially due to solitary foraging  
401 behavior, in which females forage alone without recruiting other workers.

402 *Melipona* species present a unique foraging pattern among stingless bees, not only because  
403 they are amongst the largest stingless bees (up to 15 mm, Michener 2007), but because they show  
404 clear preferences towards some groups of plants<sup>22,62</sup>. *Melipona* are also the only stingless bees  
405 capable of buzzing to harvest pollen<sup>63</sup>, but pollen-flowers that require buzz-pollination for pollen  
406 harvesting were not abundant in the samples, even though species with poricidal anthers were  
407 observed flowering around the nests during the months of collection (e.g., *Miconia ferruginata* DC,  
408 *Pleroma stenocarpum* (Schrank & Mart. ex DC.) Triana, *Solanum falciforme* Farruggia).

409 Our botanical surveys also reinforced the patterns of floral exploitation among the three  
410 species, such as the apparent preference for trees with mass flowering by stingless bees, even  
411 though their exploitation demands a long flight range. Some stingless bees' sophisticated  
412 communication abilities allow a massive recruitment of foragers when mass blooming plants are  
413 available<sup>19</sup>. In the case of *Tetragonisca angustula*, which is considered a solitary forager, the range of  
414 pollen sources is wider and seems less biased towards mass blooming plants. In the Atlantic  
415 rainforest, another hyper diverse neotropical ecosystem,<sup>20</sup> observed that stingless bees have a

416 preference for upper canopy stratum with small hermaphroditic or monoecious whitish flowers  
417 and abundant resources (pollen and/or nectar). Importantly, most of their preferred trees flower in  
418 mass, i.e produce a large number of flowers over a short period of time<sup>20</sup>. In the Cerrado savannas,  
419 where the nests were, we observed the typical high frequency of shrubs and herbaceous species in  
420 stingless bees pollen (ca. 38% of samples), which reflects the savanna physiognomy where herbs  
421 and shrubs are predominant<sup>64</sup>. However, despite the high availability of flowers in the savanna  
422 surrounding their nests, they still flew up to riverine forests at least 630 m far from the nests to  
423 collect resources where mass-flowering species were more common.

424 Flight distance in bees is usually related to body size (larger bees tend to have wider flight  
425 ranges)<sup>65</sup> and social behavior (social bees have a larger foraging distance than solitary bees due to  
426 the potential communication and recruitment between individuals)<sup>66</sup>. Given that the closest  
427 riverine forest is located at a distance of 630 m to the nests, and that species from this habitat were  
428 among the most abundant in the samples, this suggests that all three stingless bee species will  
429 forage and probably recruit at least 630 m from their nests, supporting the hypothesis of long-  
430 distance foraging when attractive rewards are available<sup>20</sup>. This distance is well within the known  
431 flight range of *Melipona* whose typical flight distance is about 2 km, but can be extended up to 10  
432 km<sup>18</sup>, but it is more surprising for *Scaptotrigona* and *Tetragonisca* whose reported maximum flight  
433 distances are 1.7 to 0.6 km, respectively<sup>18</sup>.

434 These estimates of minimum foraging distance of 630m are considered trustworthy based  
435 on the high frequency of pollen from species occurring only in riverine forests (Group 1), e.g.  
436 *Syzygium cumini*, an introduced species that only occurs in a small portion of the nearest riverine  
437 forest to the nests. Other highly abundant species in our samples are common in the Distrito  
438 Federal riverine forests (*Clusia cruiua*, *Hedyosmum brasiliense*, *Miconia birtella*, *Piper aduncum*, *Richeria*  
439 *grandis*)<sup>67-69</sup> and were only found in our surveys of the riverine forests (Table 1).



440           Some plant families stand out as the most important floral sources for the three stingless  
441 bee species, i.e. have one or more species amongst the 30 most frequent ASVs. Amongst them,  
442 Myrtaceae, Anacardiaceae, Sapindaceae, Melastomataceae, Euphorbiaceae, and Asteraceae are well-  
443 known as common resources for stingless bees globally<sup>17</sup>, while Loranthaceae and Malpighiaceae  
444 are frequent in other studies<sup>62</sup>. Phyllanthaceae, Primulaceae, Chloranthaceae and Piperaceae,  
445 however, have been only rarely reported<sup>22</sup>. Asteraceae, Myrtaceae, and Melastomataceae are  
446 amongst the most speciose plant families in the IBGE reserve, representing at least 300 species  
447 with different life forms (from herbs to trees) in the flora<sup>28</sup>, but it is surprising that other diverse  
448 plant families in the IBGE area, i.e. Fabaceae, Lamiaceae and Orchidaceae, which also represent  
449 close to 300 species combined<sup>28</sup>, are less conspicuous or totally absent from our most frequent 30  
450 taxa. This means that, although the important floral sources for stingless bees partially overlap with  
451 the most common plants in the area, indicating that abundant sources are preferred, this is not  
452 always the case. This could simply mean that species within these families were not flowering at the  
453 time of sampling, but it is worth noting that Lamiaceae, papilionoid legumes and orchids share  
454 complex floral morphologies that are different from those of the families recorded as most  
455 abundant in our samples. These three families tend to present flowers with bilateral symmetry,  
456 specialized petals and androecia, and deep, hidden resources that often forces floral visitors to  
457 approach and handle the flowers in a specific way<sup>70</sup>. Our results confirm the hypothesis raised by<sup>20</sup>  
458 that stingless bees may be specialized in exploiting small, open resource “bowl-type” flowers<sup>52</sup>,  
459 with exposed stamens and nectar, that are produced in large numbers. They may also favour plant  
460 species with a “big bang” flowering phenology i.e., that that undergo mass blooming for short  
461 periods. Floral morphology, floral chemistry and phenology of plants exploited by stingless bees  
462 deserve further investigation. Investigations of plant resources exploited by stingless bees using  
463 metabarcoding over a longer time periods, in other types of vegetation, and of other bee species,  
464 would also be desirable to consolidate our knowledge of stingless bee ecology in the Neotropics.

465

## 466 **Acknowledgements**

467 We would like to thank Instituto Serapilheira for the grant conceived (Chamada Publica N° 2 -  
468 2018). We thank the IBGE reserve for allowing and supporting our field work collecting data;  
469 Antonio Leite from IBRAMEL stingless beekeepers association for kindly donating the nests that  
470 were used in the experiments. AJCA acknowledged FAPDF for the financial support (00193-  
471 00001229/2021-48). ACM thanks the CNPq for the postdoctoral fellowship (159694/2018-3) and  
472 CEBP for the CNPQ PQ2 fellowship. KN & MMC thanks their undergraduate scholarships  
473 (ProIC UnB). FAC acknowledge the CAPES/PRINT program (Edital n° 41/2017  
474 88887.716844/2022-00) for allowing the visit of Alexander Keller to UFMG.

475

## 476 **Data Availability**

477 The data that support the findings of this study is available at public repositories: molecular  
478 sequence data is available at NCBI (Bioproject 976708); plant species list with voucher information  
479 is available at Species Link by searching on the collector name “Projeto Barcode Cerrado”.

480

## 481 **References**

482

- 483 1. Klein, A. M. *et al.* Importance of pollinators in changing landscapes for world crops.  
484 *Proceedings. Biological sciences / The Royal Society* **274**, 303–13 (2007).
- 485 2. Gallai, N., Salles, J., Settele, J. & Vaissiere, B. Economic valuation of the vulnerability of  
486 world agriculture confronted with pollinator decline. *Ecological Economics* **68**, 810–821 (2009).
- 487 3. Michener, C. D. *The bees of the world.* (The John Hopkins University Press, 2007).
- 488 4. Ollerton, J., Winfree, R. & Tarrant, S. How many flowering plants are pollinated by animals?  
489 *Oikos* **120**, 321–326 (2011).
- 490 5. Biesmeijer, J. C. *et al.* Parallel declines in pollinators and insect-pollinated plants in Britain  
491 and the Netherlands. *Science (1979)* **313**, 351–354 (2006).
- 492 6. Morales, C. L. *et al.* Does climate change influence the current and future projected  
493 distribution of an endangered species? The case of the southernmost bumblebee in the  
494 world. *J Insect Conserv* **26**, 257–269 (2022).

- 495 7. Parreño, M. A. *et al.* Critical links between biodiversity and health in wild bee conservation.  
496 *Trends Ecol Evol* **37**, 309–321 (2022).
- 497 8. Keller, A. *et al.* Evaluating multiplexed next-generation sequencing as a method in  
498 palynology for mixed pollen samples. *Plant Biol* **17**, 558–566 (2015).
- 499 9. Sickel, W. *et al.* Increased efficiency in identifying mixed pollen samples by meta-barcoding  
500 with a dual-indexing approach. *BMC Ecol* **15**, 1–9 (2015).
- 501 10. Baksay, S. *et al.* Experimental quantification of pollen with DNA metabarcoding using ITS1  
502 and trnL. *Sci Rep* **10**, (2020).
- 503 11. Khansaritoreh, E. *et al.* Employing DNA metabarcoding to determine the geographical  
504 origin of honey. *Heliyon* **6**, (2020).
- 505 12. Elliott, B. *et al.* Pollen diets and niche overlap of honey bees and native bees in protected  
506 areas. *Basic Appl Ecol* **50**, 169–180 (2021).
- 507 13. Wilson, R. S. *et al.* Landscape simplification modifies trap-nesting bee and wasp  
508 communities in the subtropics. *Insects* **11**, 1–15 (2020).
- 509 14. Camargo, J. M. F., Pedro, S. R. M. & Melo, G. A. R. Meliponini Lepeletier, 1836. in  
510 *Catalogue of Bees (Hymenoptera, Apoidea) in the Neotropical Region - online version.* (2013).
- 511 15. Janousek, W. M. *et al.* Recent and future declines of a historically widespread pollinator  
512 linked to climate, land cover, and pesticides. *Proc Natl Acad Sci U S A* **120**, (2023).
- 513 16. Slaa, E. J., Chaves, L. A. S., Malagodi-Braga, K. & Hofstede, F. E. Stingless bees in applied  
514 pollination: practice and perspectives. *Apidologie* **37**, 293–315 (2006).
- 515 17. Bueno, F. G. B. *et al.* Stingless bee floral visitation in the global tropics and subtropics. *Glob*  
516 *Ecol Conserv* **43**, e02454 (2023).
- 517 18. Nunes-Silva, P. *et al.* Radiofrequency identification (RFID) reveals long-distance flight and  
518 homing abilities of the stingless bee *Melipona fasciculata*. *Apidologie* **51**, 240–253 (2020).
- 519 19. Biesmeijer, J. C. & Slaa, E. J. Information flow and organization of stingless bee foraging.  
520 *Apidologie* **35**, 143–157 (2004).
- 521 20. Ramalho, M. Stingless bees and mass flowering trees in the canopy of Atlantic Forest: a  
522 tight relationship. *Acta Bot Brasiliica* **18**, 37–47 (2004).
- 523 21. Bell, K. L. *et al.* Pollen DNA barcoding: current applications and future. *Genome* **640**, 629–  
524 640 (2016).
- 525 22. Vit, P., Pedro, S. R. M. & Roubik, D. W. *Pot-pollen in stingless bee melittology. Pot-Pollen in*  
526 *Stingless Bee Melittology* (Springer International Publishing, 2018). doi:10.1007/978-3-319-  
527 61839-5.
- 528 23. Myers, N., Mittermeier, R. A., Mittermeier, C. G., da Fonseca, G. A. B. & Kent, J.  
529 Biodiversity hotspots for conservation priorities. *Nature* **403**, 853 (2000).
- 530 24. Flora e Funga do Brasil. Flora e Funga do Brasil. *Jardim Botânico do Rio de Janeiro*  
531 <https://floradobrasil.jbrj.gov.br/>.
- 532 25. Silva-Souza, K. J. P., Pivato, M. G., Silva, V. C., Haidar, R. F. & Souza, A. F. New patterns  
533 of the tree beta diversity and its determinants in the largest savanna and wetland biomes of  
534 South America. *Plant Divers* (2022) doi:10.1016/j.pld.2022.09.006.
- 535 26. Silberbauer-Gottsberger, I. & Gottsberger, G. A polinização de plantas do Cerrado. *Rev Bras*  
536 *Biol* **48**, 651–663 (1988).

- 537 27. Vasconcelos, T. A trait-based approach to determining principles of plant biogeography.  
538 *Am J Bot* **110**, (2023).
- 539 28. Pereira, B. A. S. & Furtado, P. P. Vegetação da bacia do córrego Taquara: coberturas  
540 naturais e antrópicas. in *Reserva Ecológica do IBGE: Biodiversidade Terrestre* vol. 1 89–117 (2011).
- 541 29. Rasmussen, C. & Cameron, S. A. Global stingless bee phylogeny supports ancient  
542 divergence, vicariance, and long distance dispersal. *Biological Journal of the Linnean Society* **99**,  
543 206–232 (2010).
- 544 30. Campos, M. G. *et al.* Standard methods for pollen research. *J Apic Res* **60**, 1–109 (2021).
- 545 31. Rognes, T., Flouri, T., Nichols, B., Quince, C. & Mahé, F. VSEARCH: a versatile open  
546 source tool for metagenomics. *PeerJ* **4**, e2584 (2016).
- 547 32. Edgar, R. C. & Flyvbjerg, H. Error filtering, pair assembly and error correction for next-  
548 generation sequencing reads. *Bioinformatics* **31**, 3476–3482 (2015).
- 549 33. Edgar, R. C. UCHIME2: improved chimera prediction for amplicon sequencing. *bioRxiv*  
550 074252 (2016) doi:10.1101/074252.
- 551 34. Keller, A. *et al.* BCdatabaser: on-the-fly reference database creation for (meta-) barcoding.  
552 *Bioinformatics* **36**, 2630–2631 (2020).
- 553 35. Edgar, R. C. SINTAX: a simple non-Bayesian taxonomy classifier for 16S and ITS  
554 sequences. *bioRxiv* 074161 (2016) doi:10.1101/074161.
- 555 36. Ankenbrand, M. J., Keller, A., Wolf, M., Schultz, J. & Förster, F. ITS2 Database V: twice as  
556 much. *Mol Biol Evol* **32**, 3030–3032 (2015).
- 557 37. Marshall, C. A. M., Wieringa, J. J. & Hawthorne, W. D. Bioquality hotspots in the tropical  
558 African flora. *Current Biology* **26**, 3214–3219 (2016).
- 559 38. R Core Team. R: a language and environment for statistical computing. Preprint at  
560 <https://www.r-project.org/> (2021).
- 561 39. McMurdie, P. J. & Holmes, S. *phyloseq*: An R Package for reproducible interactive analysis  
562 and graphics of microbiome census data. *PLoS One* **8**, e61217- (2013).
- 563 40. Oksanen, J., Kindt, R., Legendre, P., O'Hara, B. & Stevens, H. The vegan package.  
564 *Community ecology package* **10**, 631–637 (2007).
- 565 41. Dormann, C. F., Gruber, B. & Fründ, J. Introducing the bipartite Package: Analysing  
566 Ecological Networks. *R News* **8**, 8–11 (2008).
- 567 42. Gu, Z., Gu, L., Eils, R., Schlesner, M. & Brors, B. *circize* implements and enhances circular  
568 visualization in R. *Bioinformatics* **30**, 2811–2812 (2014).
- 569 43. Garnier, S. *et al.* *viridis* - Colorblind-Friendly Color Maps for R. Preprint at (2021).
- 570 44. Absy, M. L., Rech, A. R. & Ferreira, M. G. Pollen Collected by Stingless Bees: A  
571 Contribution to Understanding Amazonian Biodiversity. in *Pot-Pollen in Stingless Bee*  
572 *Melittology* 29–46 (Springer International Publishing, 2018). doi:10.1007/978-3-319-61839-  
573 5\_3.
- 574 45. Moura, C. C. M. *et al.* Biomonitoring via DNA metabarcoding and light microscopy of bee  
575 pollen in rainforest transformation landscapes of Sumatra. *BMC Ecol Evol* **22**, 1–15 (2022).
- 576 46. Roubik, D. & Patiño, J. E. M. The stingless honey bees (Apidae, Apinae: Meliponini) in  
577 Panama and pollination ecology from pollen analysis. in *Pot-Pollen in Stingless Bee Melittology*  
578 (eds. Vit, P., Pedro, S. R. M. & Roubik, D. W.) 47–66 (Springer, 2018).

- 579 47. Elliott, B. *et al.* Pollen diets and niche overlap of honey bees and native bees in protected  
580 areas. *Basic Appl Ecol* **50**, 169–180 (2021).
- 581 48. Pound, M. J. *et al.* Determining if honey bees (*Apis mellifera*) collect pollen from  
582 anemophilous plants in the UK. *Palynology* (2022) doi:10.1080/01916122.2022.2154867.
- 583 49. Malerbo-Souza, D. T., Da Silva, T. G., De Andrade, M. O., De Farias, L. R. & Medeiros, N.  
584 M. G. Factors affecting the foraging behavior of bees in different maize hybrids. *Revista*  
585 *Brasileira de Ciencias Agrarias* **13**, (2018).
- 586 50. Costa, A. C. G., Albuquerque, I. S., Thomas, W. W. & Machado, I. C. Influence of  
587 environmental variation on the pollination of the ambophilous sedge *Rhynchospora ciliata*  
588 (Cyperaceae). *Plant Ecol* **219**, 241–250 (2018).
- 589 51. Gottsberger, G. Generalist and specialist pollination in basal angiosperms (ANITA grade,  
590 basal monocots, magnoliids, Chloranthaceae and Ceratophyllaceae): what we know now.  
591 *Plant Divers Evol* **131**, 263–362 (2015).
- 592 52. Faegri, K. & van der Pijl, L. *Principles of pollination ecology*. (Pergamon Press, 1979).
- 593 53. Saunders, M. E. Insect pollinators collect pollen from wind-pollinated plants: implications  
594 for pollination ecology and sustainable agriculture. *Insect Conserv Divers* **11**, 13–31 (2018).
- 595 54. Oliveira, M. L. & Morato, E. F. Stingless bees (Hymenoptera, Meliponini) feeding on  
596 stinkhorn spores (Fungi, Phallales): robbery or dispersal? *Rev Bras Zool* **17**, 881–884 (2000).
- 597 55. Barth, O. M., Freitas, A. da S. de & Rio Branco, C. dos S. Pollen collected by stingless bees  
598 in a reforested urban area of Rio de Janeiro city. *Bee World* **98**, 23–26 (2021).
- 599 56. Parish, J. B., Scott, E. S. & Hogendoorn, K. Nutritional benefit of fungal spores for honey  
600 bee workers. *Sci Rep* **10**, (2020).
- 601 57. Leonhardt, S. D. Chemical ecology of stingless bees. *J Chem Ecol* **43**, 385–402 (2017).
- 602 58. Asakawa, Y. Highlights in phytochemistry of hepaticae-biologically active terpenoids and  
603 aromatic compounds. *Pure & Appl. Chem* **66**, 2193–2196 (1994).
- 604 59. Sedivy, C., Müller, A. & Dom, S. Closely related pollen generalist bees differ in their ability  
605 to develop on the same pollen diet: Evidence for physiological adaptations to digest pollen.  
606 *Funct Ecol* **25**, 718–725 (2011).
- 607 60. Bryś, M. S., Skowronek, P. & Strachecka, A. Pollen diet—properties and impact on a bee  
608 colony. *Insects* **12**, (2021).
- 609 61. Keller, A. *et al.* (More than) Hitchhikers through the network: The shared microbiome of  
610 bees and flowers. *Curr Opin Insect Sci* **44**, 8–15 (2021).
- 611 62. Ramalho, M., Kleinert-Giovannini, A. & Imperatriz-Fonseca, V. L. Important bee plants for  
612 stingless bees (*Melipona* and *Trigonini*) and africanized honeybees (*Apis mellifera*) in  
613 neotropical habitats: a review. *Apidologie* **21**, 469–488 (1990).
- 614 63. Nunes-Silva, P., Hrnčir, M., Da Silva, C. I., Roldão, Y. S. & Imperatriz-Fonseca, V. L.  
615 Stingless bees, *Melipona fasciculata*, as efficient pollinators of eggplant (*Solanum melongena*) in  
616 greenhouses. *Apidologie* **44**, 537–546 (2013).
- 617 64. Klink, C. A., Sato, M. N., Cordeiro, G. G. & Ramos, M. I. M. The role of vegetation on the  
618 dynamics of water and fire in the cerrado ecosystems: Implications for management and  
619 conservation. *Plants* vol. 9 1–27 Preprint at <https://doi.org/10.3390/plants9121803> (2020).
- 620 65. Greenleaf, S. S., Williams, N. M., Winfree, R. & Kremen, C. Bee foraging ranges and their  
621 relationship to body size. *Oecologia* **153**, 589–96 (2007).

- 622 66. Grüter, C. & Hayes, L. Sociality is a key driver of foraging ranges in bees. *Current Biology* **32**,  
623 5390-5397.e3 (2022).
- 624 67. Darosci, A. A. B., Takahashi, F. S. C., Proença, C. E. B., Soares-Silva, L. H. & Munhoz, C.  
625 B. R. Does spatial and seasonal variability in fleshy-fruited trees affect fruit availability? A  
626 case study in gallery forests of Central Brazil. *Acta Bot Brasilica* **35**, 456–465 (2021).
- 627 68. Mendonça, R. C. *et al.* Flora vascular do Cerrado. in *Cerrado: ambiente e flora* (eds. Sano, S. M.  
628 & Almeida, S. P.) 289–556 (Embrapa-Cerrados, 1998).
- 629 69. Ratter, J. A., Bridgewater, S. & Ribeiro, F. Analysis of the floristic composition of the  
630 Brazilian cerrado vegetation III: comparison of the woody vegetation of 376 areas. *Edinb J*  
631 *Bot* **60**, 57–109 (2003).
- 632 70. Willmer, P. Pollination and floral ecology. in *Pollination and floral ecology* (Princeton University  
633 Press, 2011).
- 634
- 635

## 636 **Table and figures**

637

### 638 **Figures**

639 **Figure 1.** Map of the IBGE reserve and surroundings showing the location where bee nests were  
640 installed and the locations of Rapid Botanical Surveys. The image also shows main vegetational  
641 types, i.e. cerrado savanna, riverine forests, swamps, cultivated and urban areas. Photographs  
642 depict a. cerrado savanna vegetation type (Photo author: ACM) and b. area of transition between  
643 grassland and riverine forest (Photo author: AJCA). Vegetation cover: MapBiomias  
644 ([www.mapbiomas.org](http://www.mapbiomas.org)). Reserve delimitation: IBGE.

645

646 **Figure 2.** Interaction network of three stingless bee species and the 30 most frequent species in  
647 honey and pollen samples (Table S3). Bars connecting bee species and plant species indicate  
648 reported interaction (i.e. that plant species was present in the sequencing reads of pollen and/or  
649 honey metabarcoding in significant numbers). Some plant species are represented by numbers: 1.  
650 *Croton conduplicatus*; 2. *Eucalyptus*; 3. Myrtaceae; 4. *Clusia criuva*; 5. *Myrcia guianensis*; 6. *Miconia birtella*;  
651 7. *Myrcia splendens*; 8. *Byrsonima basiloba*; 9. *Byrsonima laxiflora*; 10. *Leandra polystachya*; 11. *Myrsine*  
652 *umbellata*; 12. *Acalypha*; 13. *Couepia*; 14. *Mabea fistulifera*; 15. Fabaceae; 16. *Myrcia tomentosa*; 17. *Ilex*

653 *affinis*; 18. *Eugenia involucrata*; 19. Moraceae; 20. *Cecropia pachystachya*; 21. *Byrsonima crassifolia*; 22.  
654 *Schefflera macrocarpa*; 23. *Artocarpus heterophyllus*; 24. *Campomanesia pubescens*; 25. *Myrcia pubescens*; 26.  
655 *Stillingia*; 27. *Syzygium*; 28. *Pinus*; 29. *Banisteriopsis*; 30. *Borago officinalis*; 31. *Byrsonima viminifolia*; 32.  
656 Melastomataceae; 33. *Euphorbia potentilloides*; 34. Asteraceae; 35. *Rosa chinensis*; 36. *Copaifera*; 37.  
657 *Trema micranthum*; 38. *Terminalia*.

658

659 **Figure 3.** Boxplot of Shannon diversity indexes of plant species found in the honey (dark grey)  
660 and pollen (light grey) pots. Boxplots display the median (thick horizontal middle bars), lower  
661 (0.25) and upper (0.75) quartile (box limiting thin horizontal bars), minimum and maximum values  
662 (vertical lines). Solid dots represent an individual outlier sample. On the left, the three studied bee  
663 species in lateral view and in scale to show body size: a. *Melipona rufiventris*, b. *Scaptotrigona postica*, c.  
664 *Tetragonisca angustula*.

665

666 **Figure 4.** Non-metric multidimensional scaling (NMDS) plots showing plant composition of  
667 honey (a) and pot pollen (b) in samples from nests of the three studied bee species: *Melipona*  
668 *rufiventris*, *Scaptotrigona postica*, *Tetragonisca angustula*.

669

670 **Figure 5.** Relative read abundance of the 30 most frequent species found in honey (left half) and  
671 pot pollen (right half) samples of nests of three stingless bee species. From top to bottom: *Melipona*  
672 *rufiventris*, *Scaptotrigona postica*, *Tetragonisca angustula*. Plant species names are displayed alphabetically.  
673 Color in graph bars refers to the habitat of occurrence in Cerrado biome (savanna or forest). Non-  
674 identified species were not assigned to any habitat, thus are represented by grey bars.

675

676

677

**Table 1.** Thirty most frequent taxa in ASVs, their habitats and habits (tree, shrub, subshrub, climber, hemiparasite), presence in pollen or honey and floral resource offered (P: pollen; N: nectar; O: oil; R: resin). Habitat data from floristic inventory in this study; numbers in parenthesis represent a record in each RBS plot (forest plots surveyed: 6; savanna plots surveyed: 11). Habit data from Flora & Funga do Brasil (2023).

| Higher taxon    | Species                           | habitat                   | habit                 | honey  | pollen | Floral reward |
|-----------------|-----------------------------------|---------------------------|-----------------------|--------|--------|---------------|
| Asteraceae      | <i>Baccharis dracunculifolia</i>  | Savanna (0)               | shrub                 | SP, TA | ALL    | PN            |
| Myrtaceae       | <i>Blepharocalyx salicifolius</i> | Savanna (7)<br>Forest (1) | tree, shrub           | ALL    | ALL    | P             |
| Malpighiaceae   | <i>Byrsonima basiloba</i>         | Savanna (1)               | shrub                 | MR, TA | TA     | PO            |
| Malpighiaceae   | <i>Byrsonima pachyphylla</i>      | Savanna (8)               | tree, shrub           | SP, TA | ALL    | PO            |
| Clusiaceae      | <i>Clusia criuva</i>              | Forest (1)                | tree, shrub           | SP, TA | SP, TA | PR            |
| Euphorbiaceae   | <i>Croton conduplicatus</i>       | Savanna (0)               | shrub, subshrub       | ALL    | TA     | PN            |
| Myrtaceae       | <i>Eucalyptus sp</i>              | Cultivated                | tree, shrub           | ALL    | ALL    | PN            |
| Nyctaginaceae   | <i>Guapira graciliflora</i>       | Savanna (6)               | tree, shrub           | ALL    | ALL    | PN            |
| Chloranthaceae  | <i>Hedyosmum brasiliense</i>      | Forest (4)                | tree, shrub           | SP, TA | ALL    | P             |
| Melastomataceae | <i>Leandra polystachya</i>        | Savanna (1)               | shrub, subshrub       | MR, SP | MR, SP | P             |
| Euphorbiaceae   | <i>Mabea fistulifera</i>          | Savanna (1)               | tree, shrub           | ALL    | SP, TA | PN            |
| Euphorbiaceae   | <i>Maprounea guianensis</i>       | Savanna (9)               | tree                  | SP, TA | ALL    | P             |
| Sapindaceae     | <i>Matayba guianensis</i>         | Savanna (3)<br>Forest (1) | tree, shrub           | ALL    | ALL    | PN            |
| Melastomataceae | <i>Miconia hirtella</i>           | Forest (2)                | tree, shrub           | MR     | MR, SP | PN            |
| Melastomataceae | <i>Miconia leucocarpa</i>         | Savanna (2)               | tree, shrub           | ALL    | MR, SP | P             |
| Melastomataceae | <i>Miconia stenostachya</i>       | Savanna (2)               | shrub                 | ALL    | ALL    | P             |
| Myrtaceae       | <i>Myrcia guianensis</i>          | Savanna (9)               | tree, shrub, subshrub | MR, SP | ALL    | P             |
| Myrtaceae       | <i>Myrcia linearifolia</i>        | Savanna (9)               | shrub, subshrub       | ALL    | ALL    | P             |
| Myrtaceae       | <i>Myrcia pinifolia</i>           | Savanna (0)               | shrub                 | ALL    | ALL    | P             |
| Myrtaceae       | <i>Myrcia tomentosa</i>           | Savanna (2)               | tree, shrub           | SP     | SP, TA | P             |



|                |                                                |                           |                                |           |        |    |
|----------------|------------------------------------------------|---------------------------|--------------------------------|-----------|--------|----|
|                |                                                | Forest (2)                |                                |           |        |    |
| Primulaceae    | <i>Myrsine sp</i>                              | ?                         | ?                              | ALL       | SP, TA | P  |
| Myrtaceae      | <i>Myrtaceae sp</i>                            | ?                         | ?                              | ALL       | ALL    | ?  |
| Piperaceae     | <i>Piper aduncum</i>                           | Forest (1)                | tree, shrub                    | ALL       | ALL    | P  |
| Phyllanthaceae | <i>Ricberia grandis</i>                        | Forest (5)                | tree, shrub                    | ALL       | ALL    | PN |
| Rosaceae       | <i>Rubus urticifolius</i>                      | Forest (4)                | climber,<br>shrub,<br>subshrub | ALL       | ALL    | PN |
| Loranthaceae   | <i>Struthanthus</i><br><i>/Pittacanthus sp</i> | ?                         | hemiparasite                   | ALL       | ALL    | PN |
| Fabaceae       | <i>Stryphnodendron sp</i>                      | Savanna (8)               | ?                              | MR,<br>SP | ALL    | PN |
| Myrtaceae      | <i>Syzygium cumini</i>                         | Forest (2<br>cultivated)  | tree                           | ALL       | ALL    | PN |
| Anacardiaceae  | <i>Tapirira guianensis</i>                     | Forest (1)<br>Savanna (3) | tree                           | ALL       | ALL    | PN |
| Anacardiaceae  | <i>Toxicodendron</i><br><i>succedaneum</i>     | Cultivated (0)            | tree                           | SP,<br>TA | SP, TA | PN |

678

679 **Supplementary information**

680

681 **Table S1.** Pollen and honey sampling collected from bee nests of the three stingless bee species:  
682 *Melipona rufiventris* (M), *Scaptotrigona postica* (S) and *Tetragonisca angustula* (T).

683

684 **Table S2.** Amplicon sequences varieties (ASVs) with significant number of reads and their taxon  
685 matches. The IBGE column records presence/absence of taxa of any level in the IBGE flora  
686 (IBGE 2011). The RBS column records if/where species were recorded in the floristic survey  
687 (distances given from nests): G=garden (650m); N=nest plot (50m); I=inner pentagon plots  
688 (700m); O=outer pentagon plots (1500m); F1=near forest (630m); F2= distant forest (2070); ? =  
689 automatically attributed to all reads not matched to species. The occurrence in honey or pollen is  
690 indicated by the bee species acronym in the relevant column: MR, *Melipona rufiventris*; SP,  
691 *Scaptotrigona postica* and TA, *Tetragonisca angustula*. Floral rewards to pollinators (pollen, nectar or oil)  
692 is presented as well as if the species is traditionally considered wind-pollinated. We assume all non-  
693 wind-pollinated are animal pollinated plants.

694



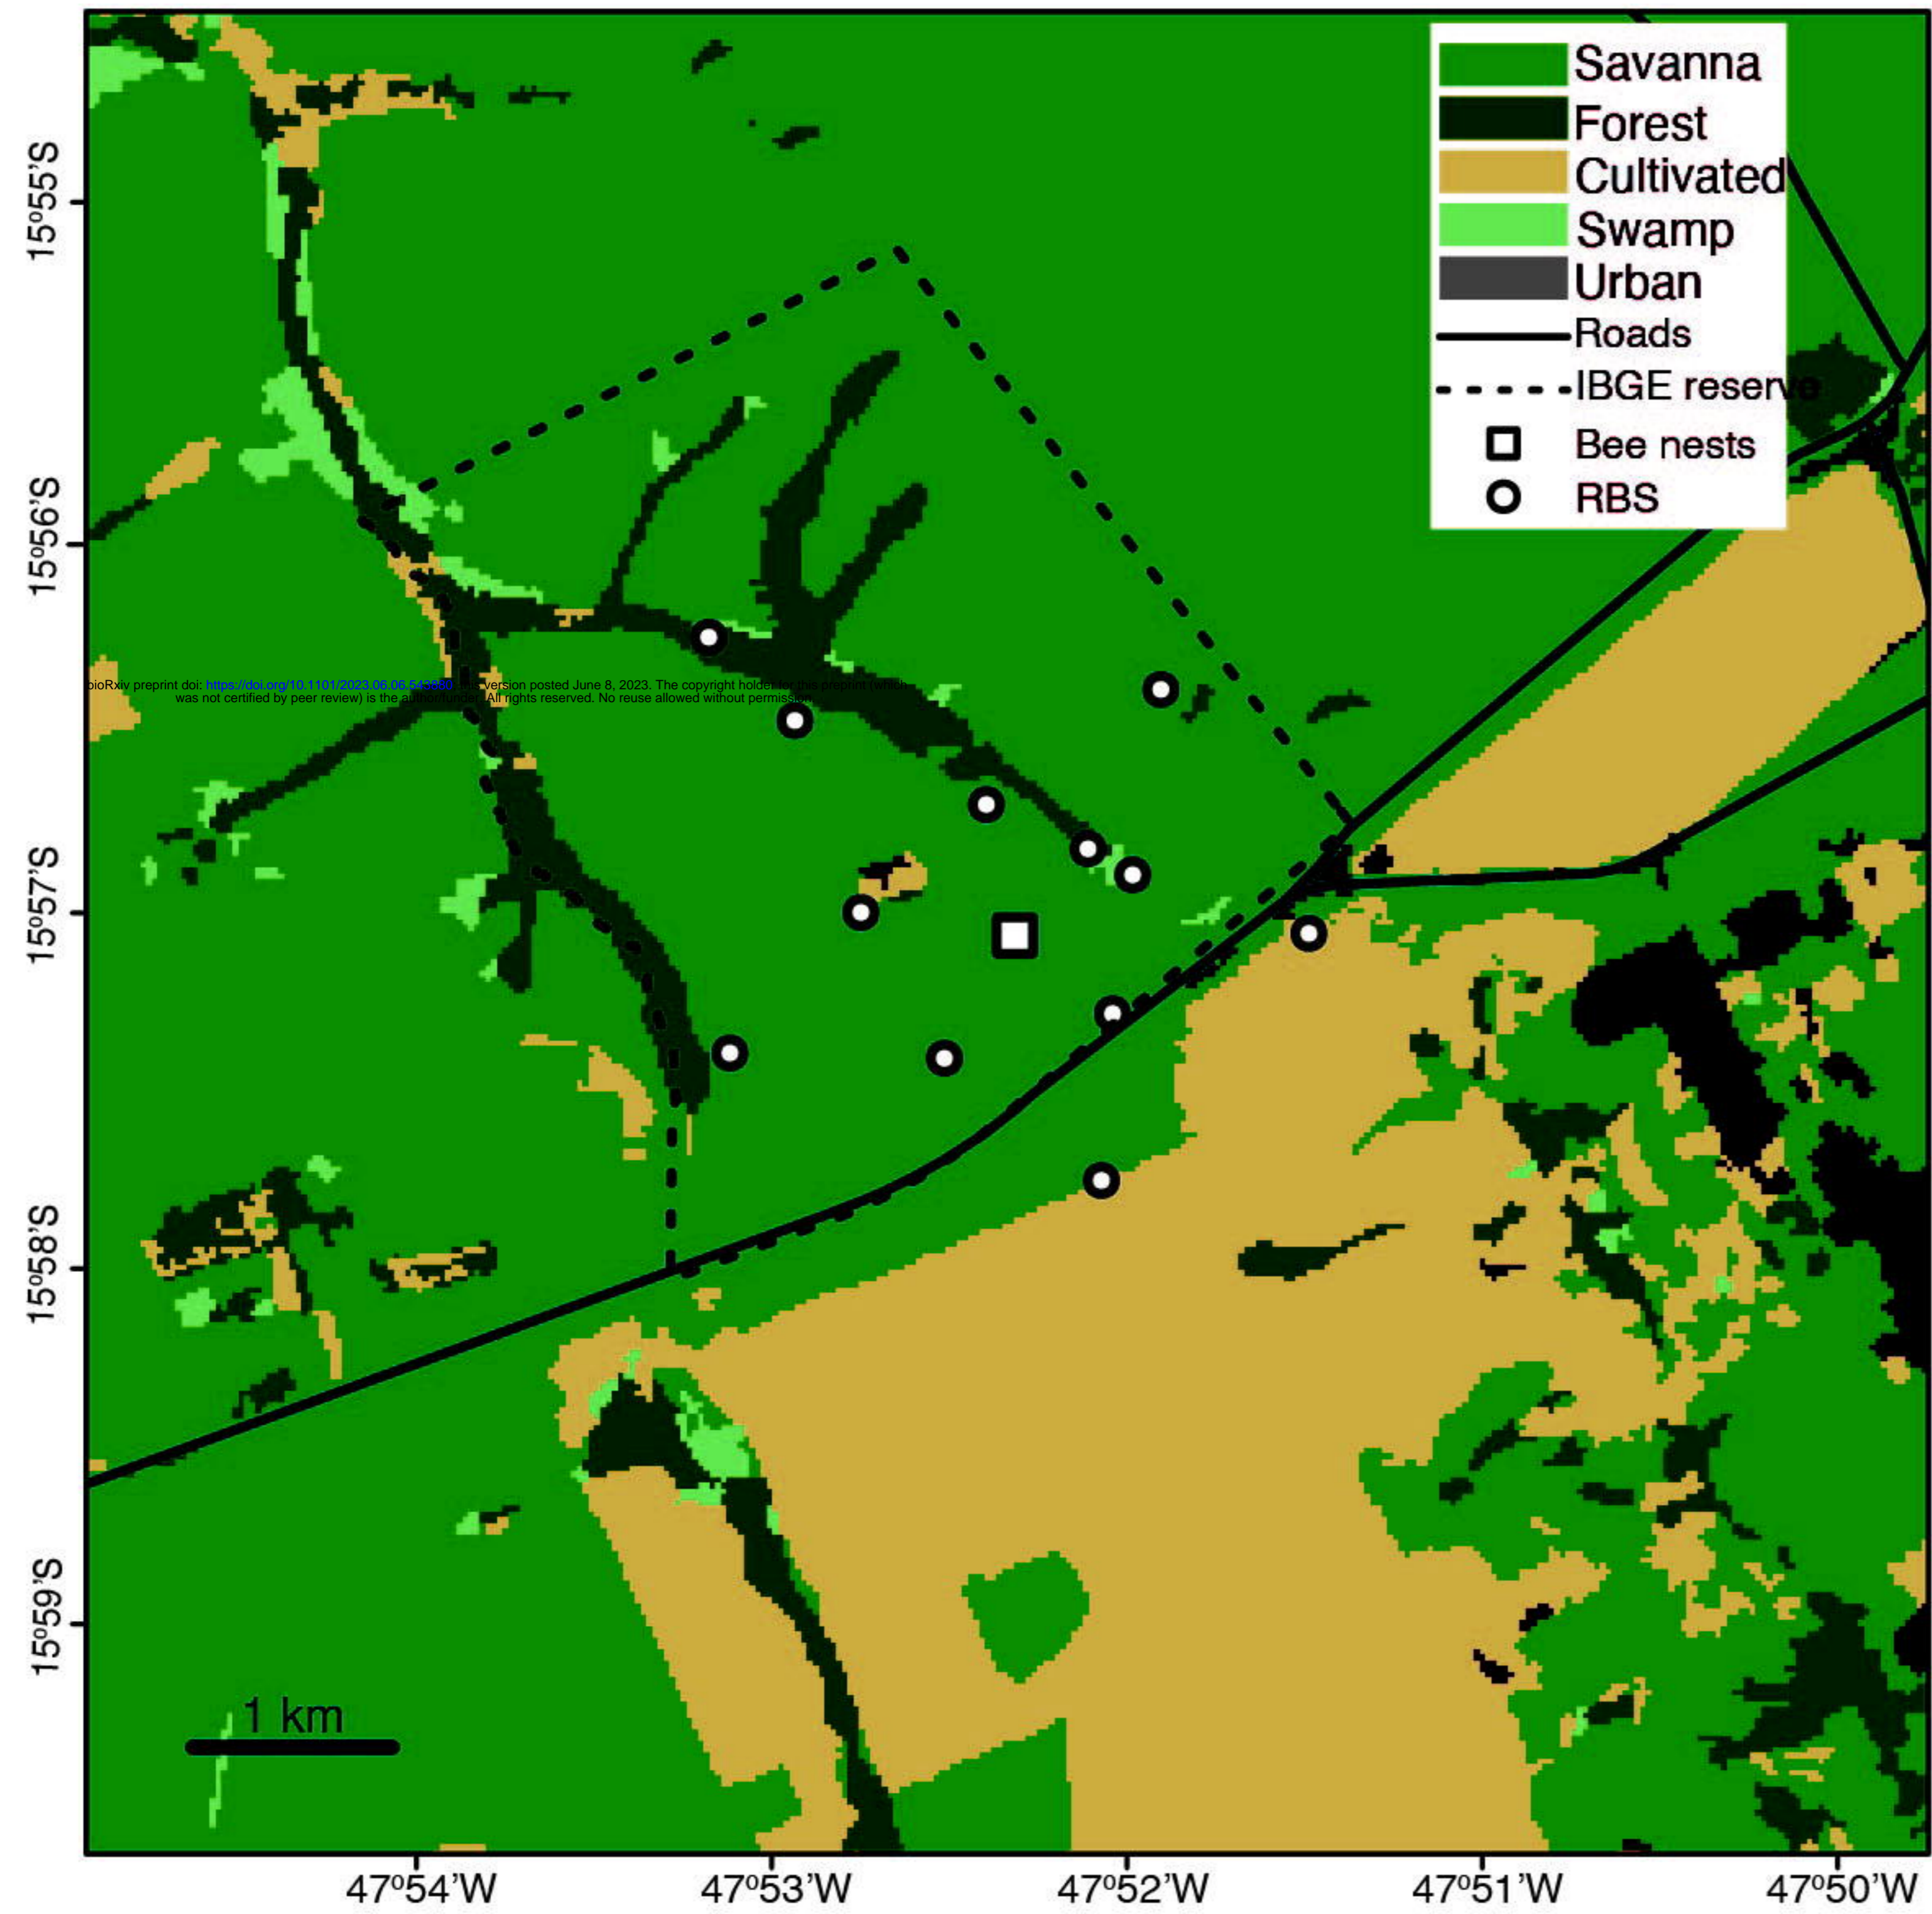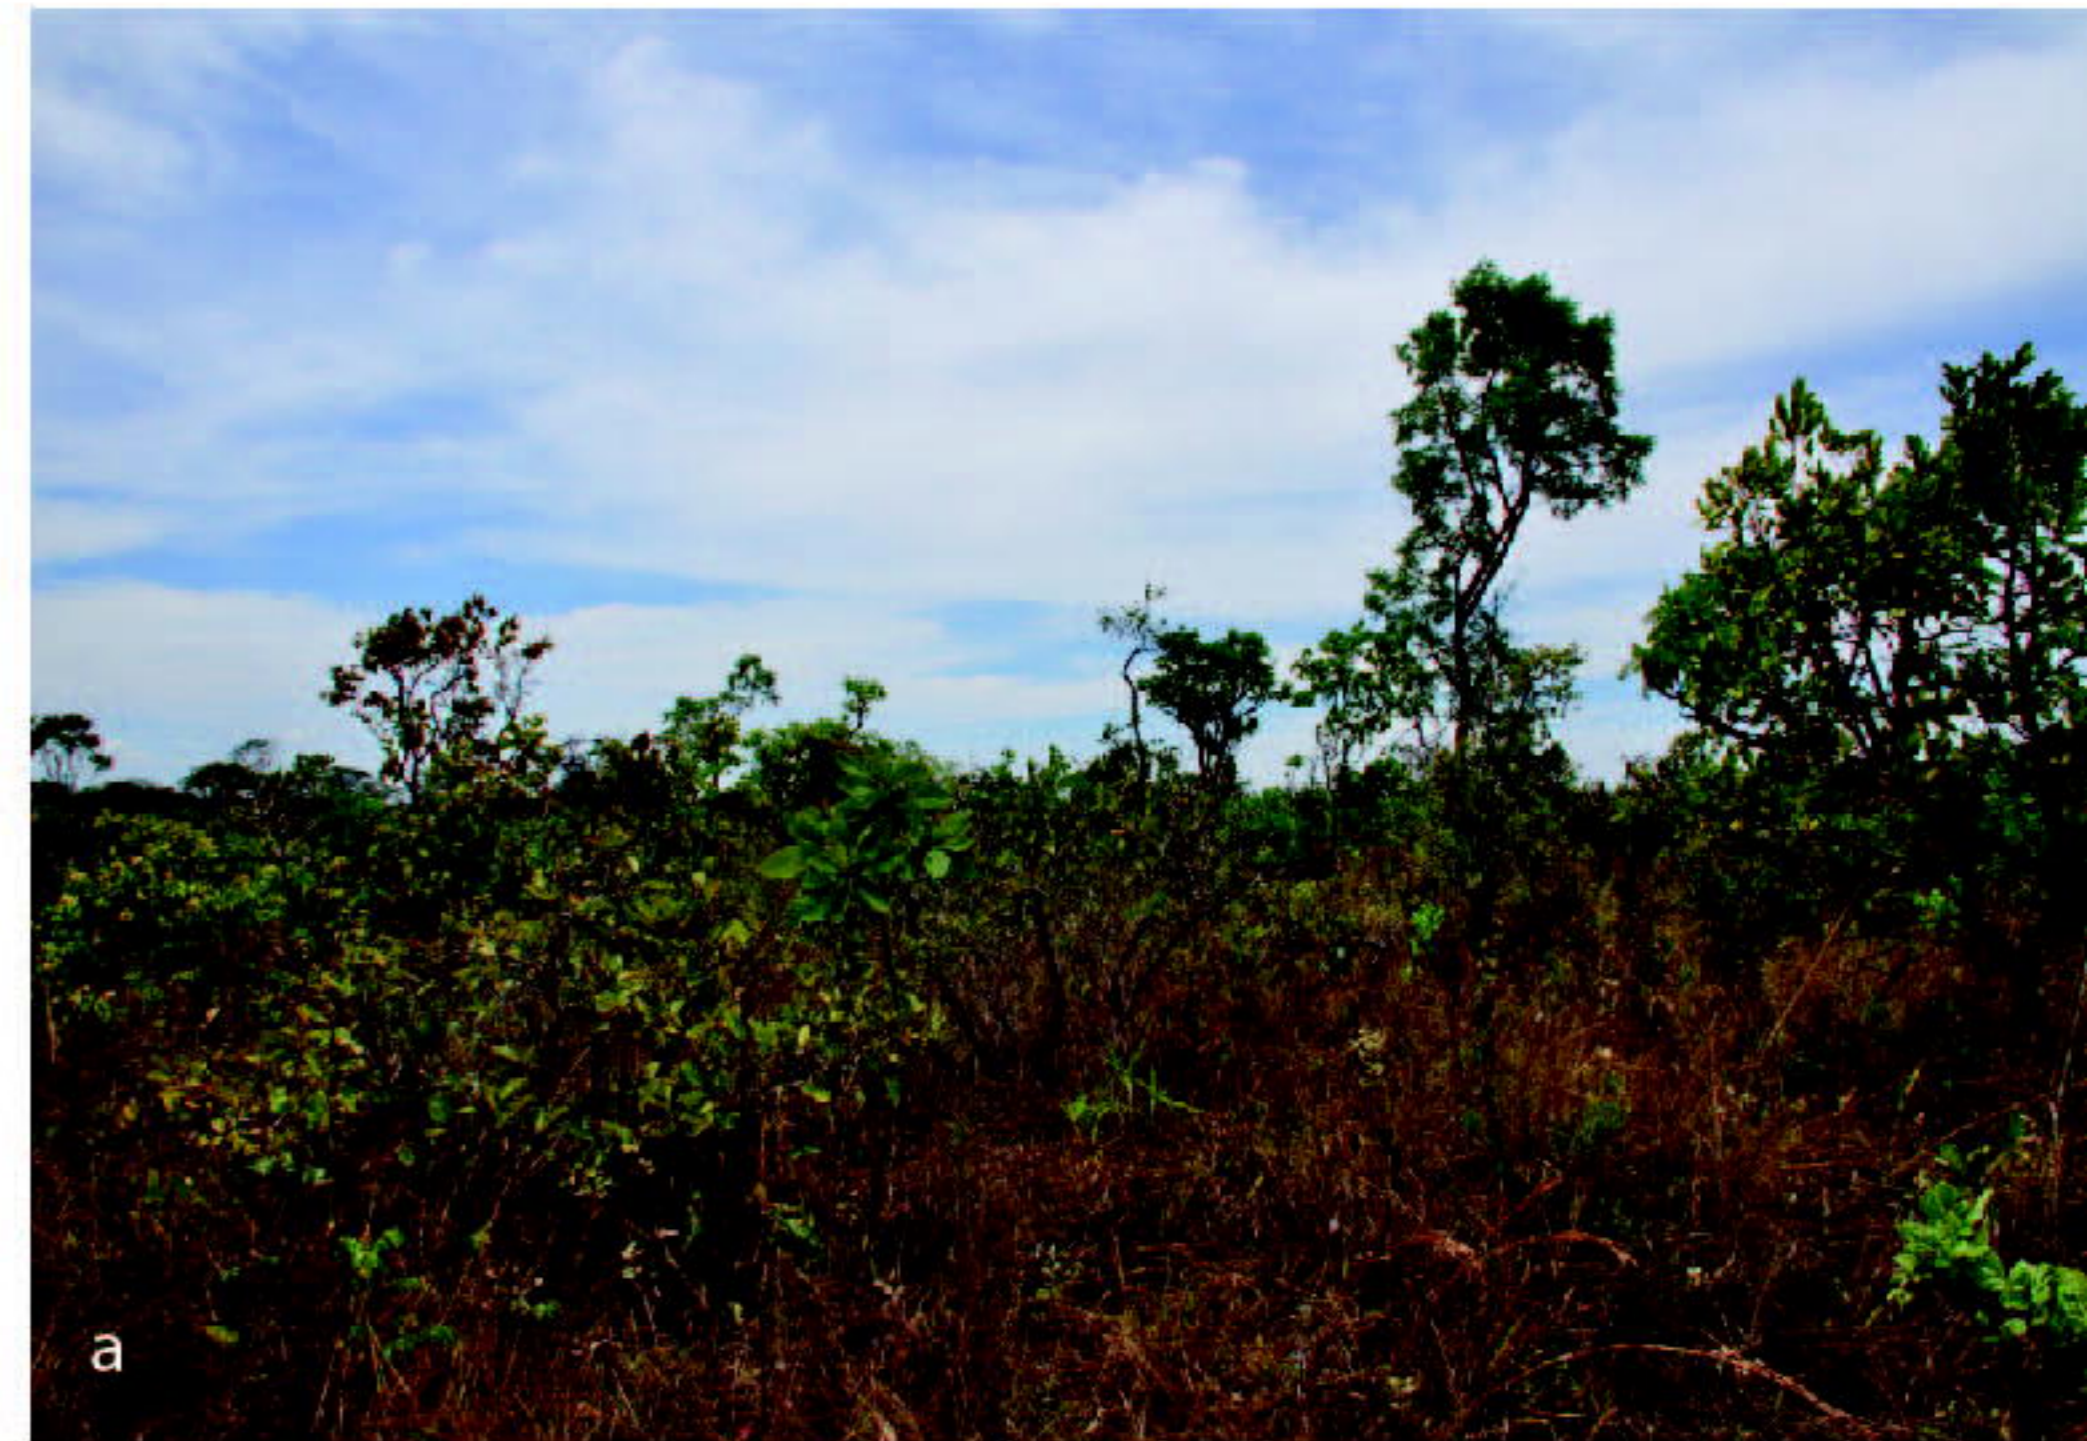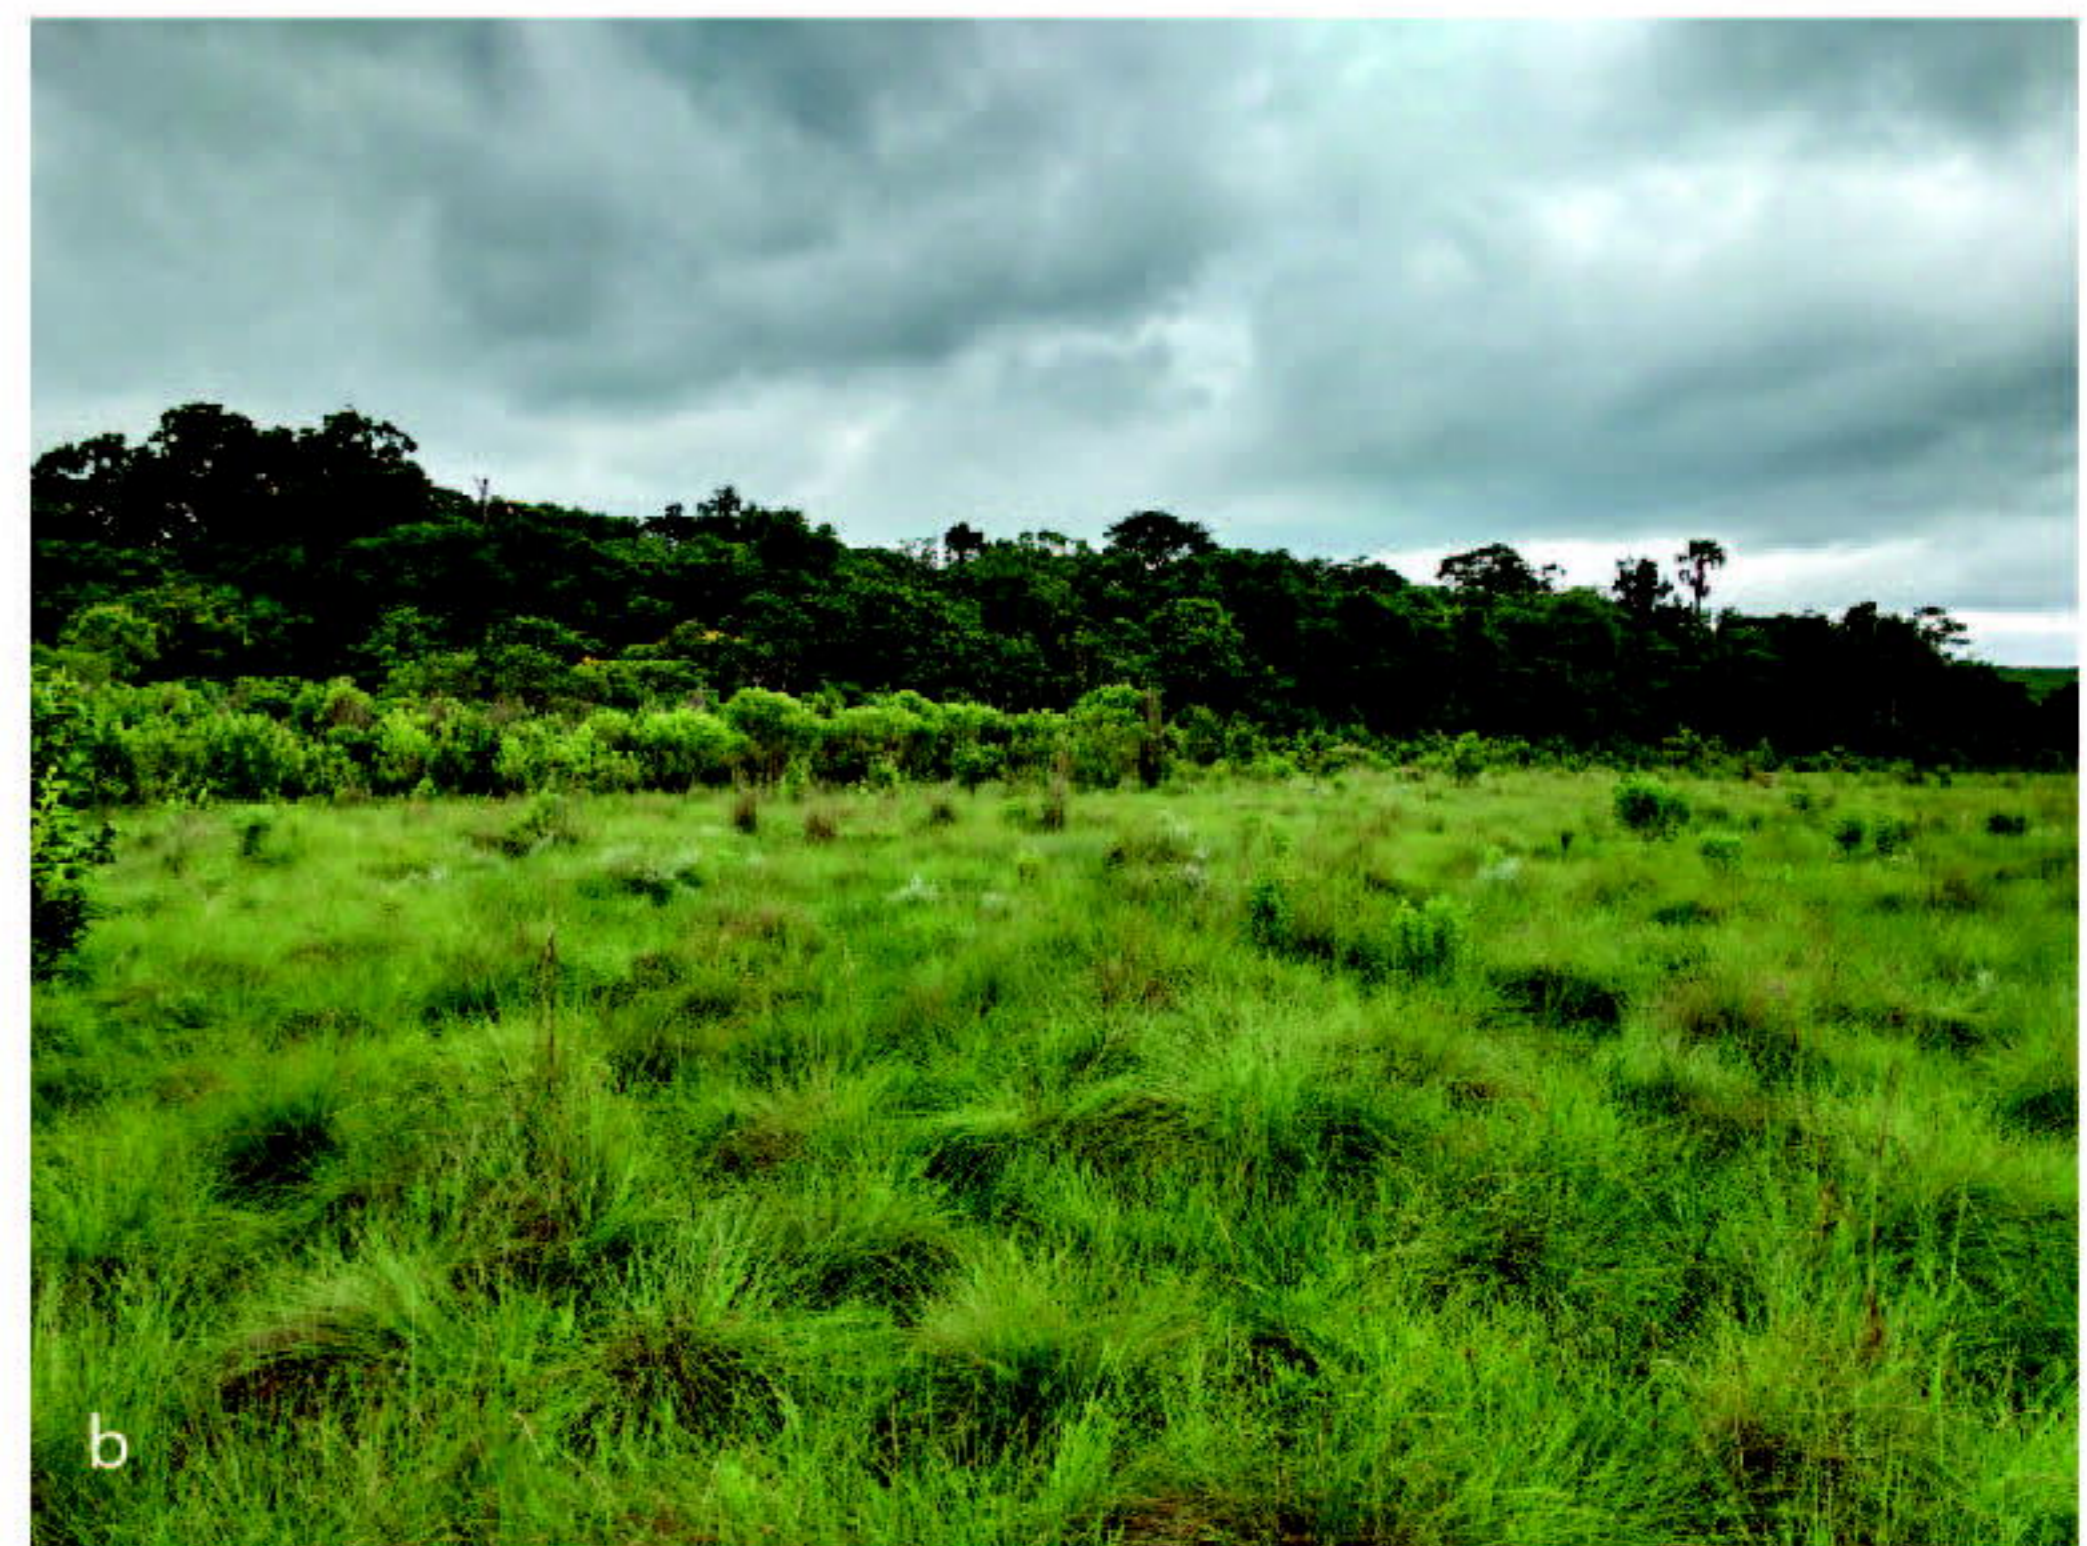



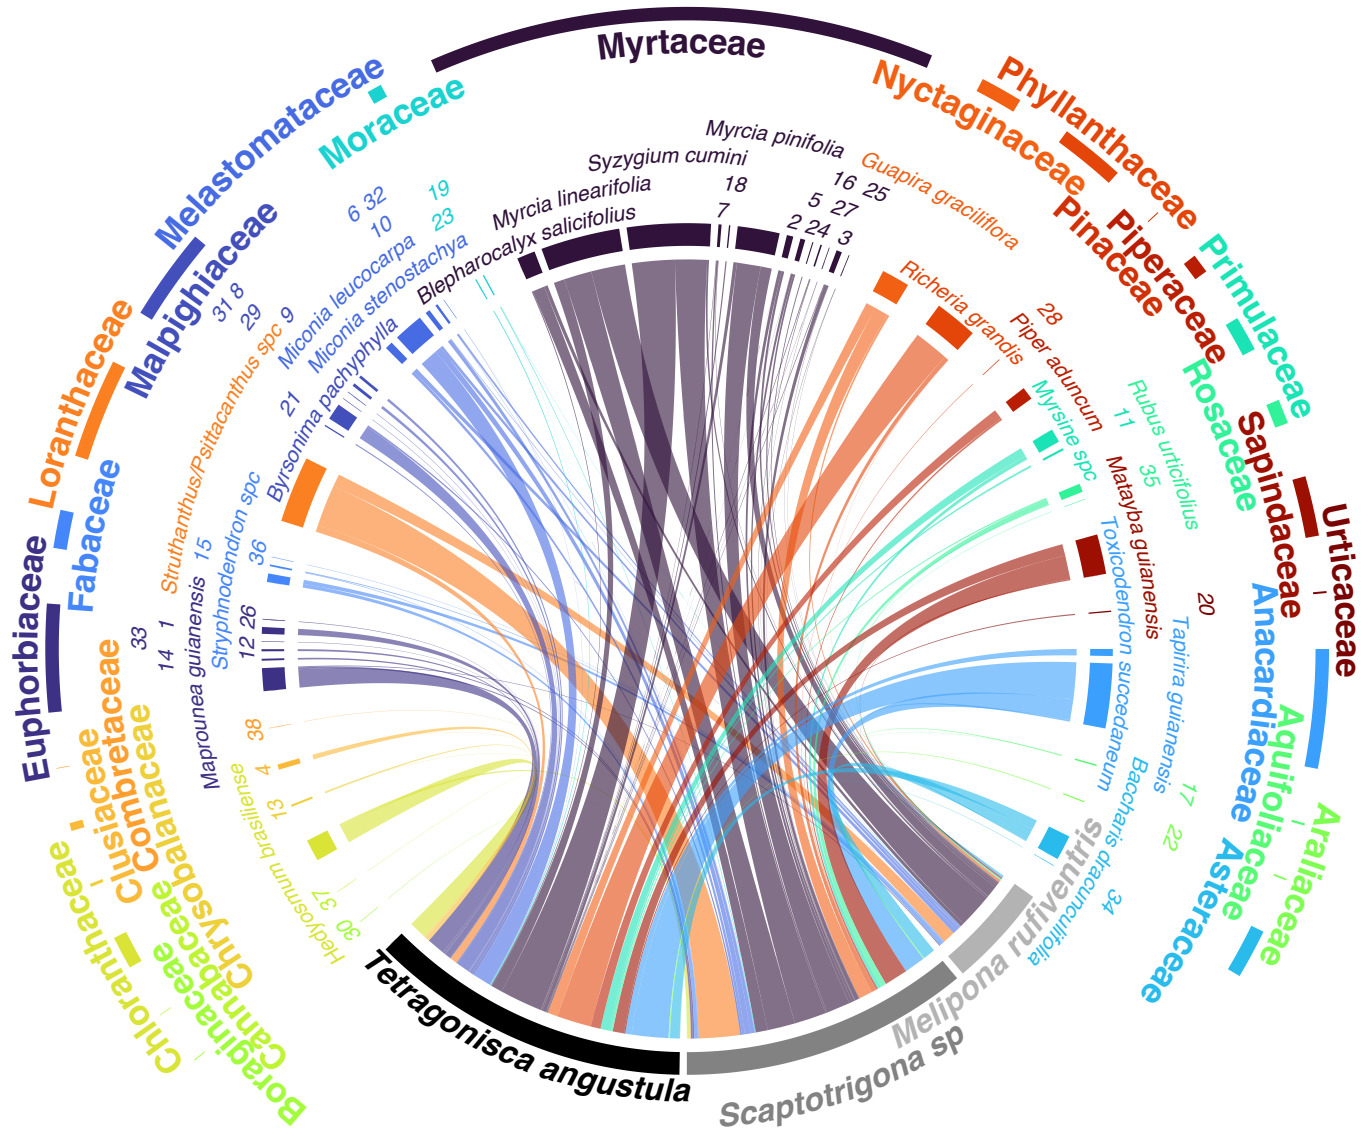

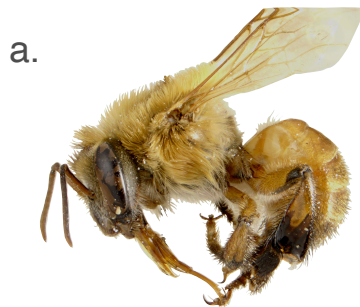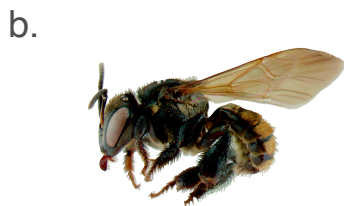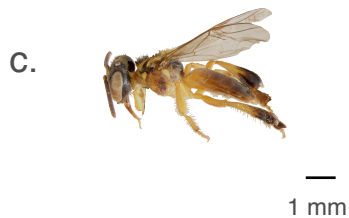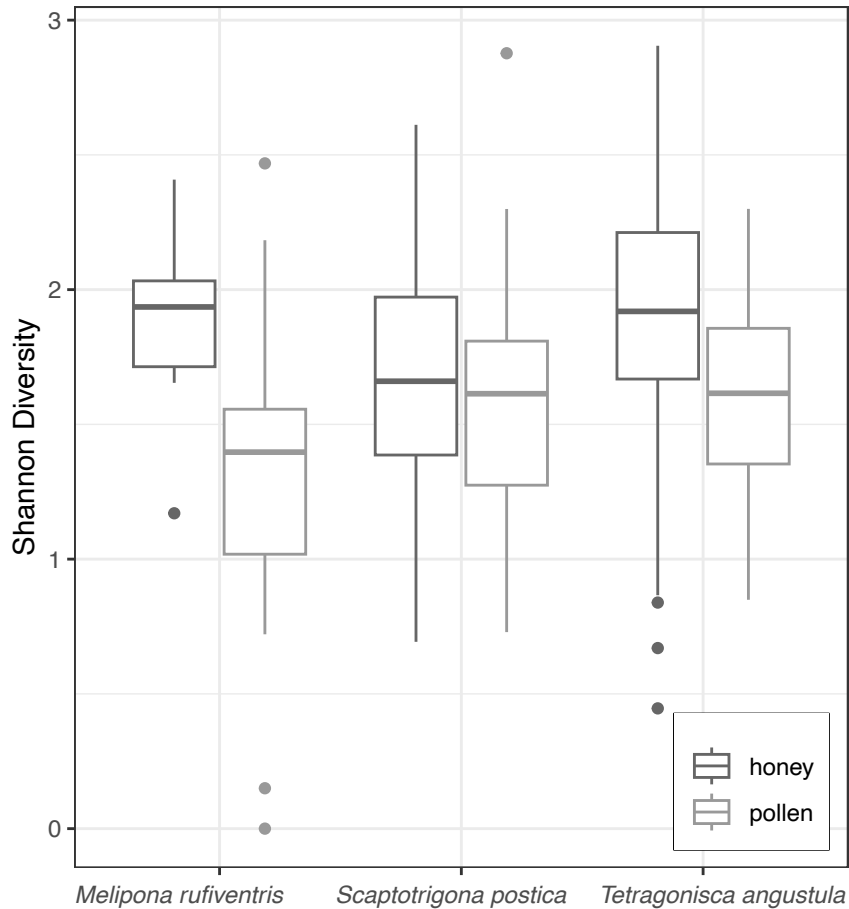

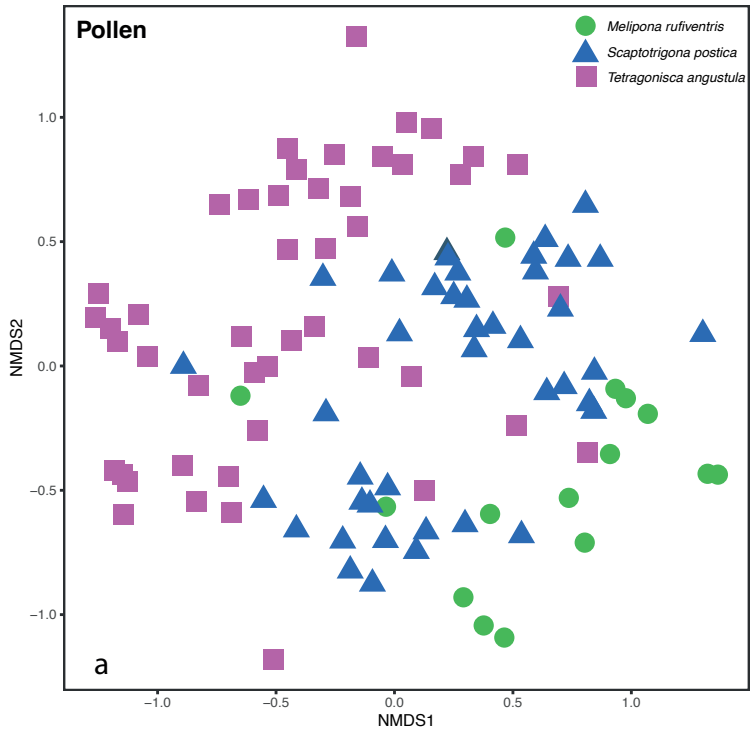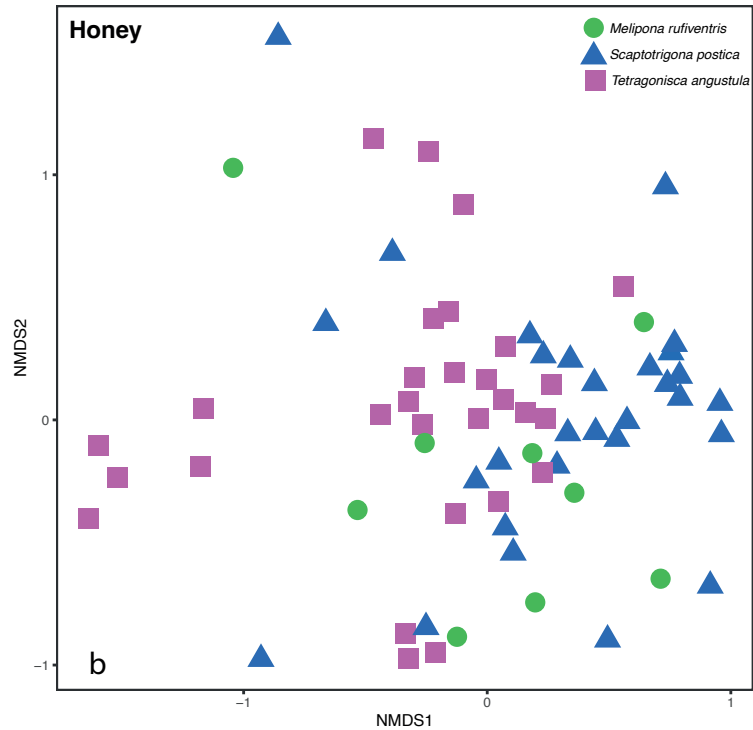

### honey

### pollen

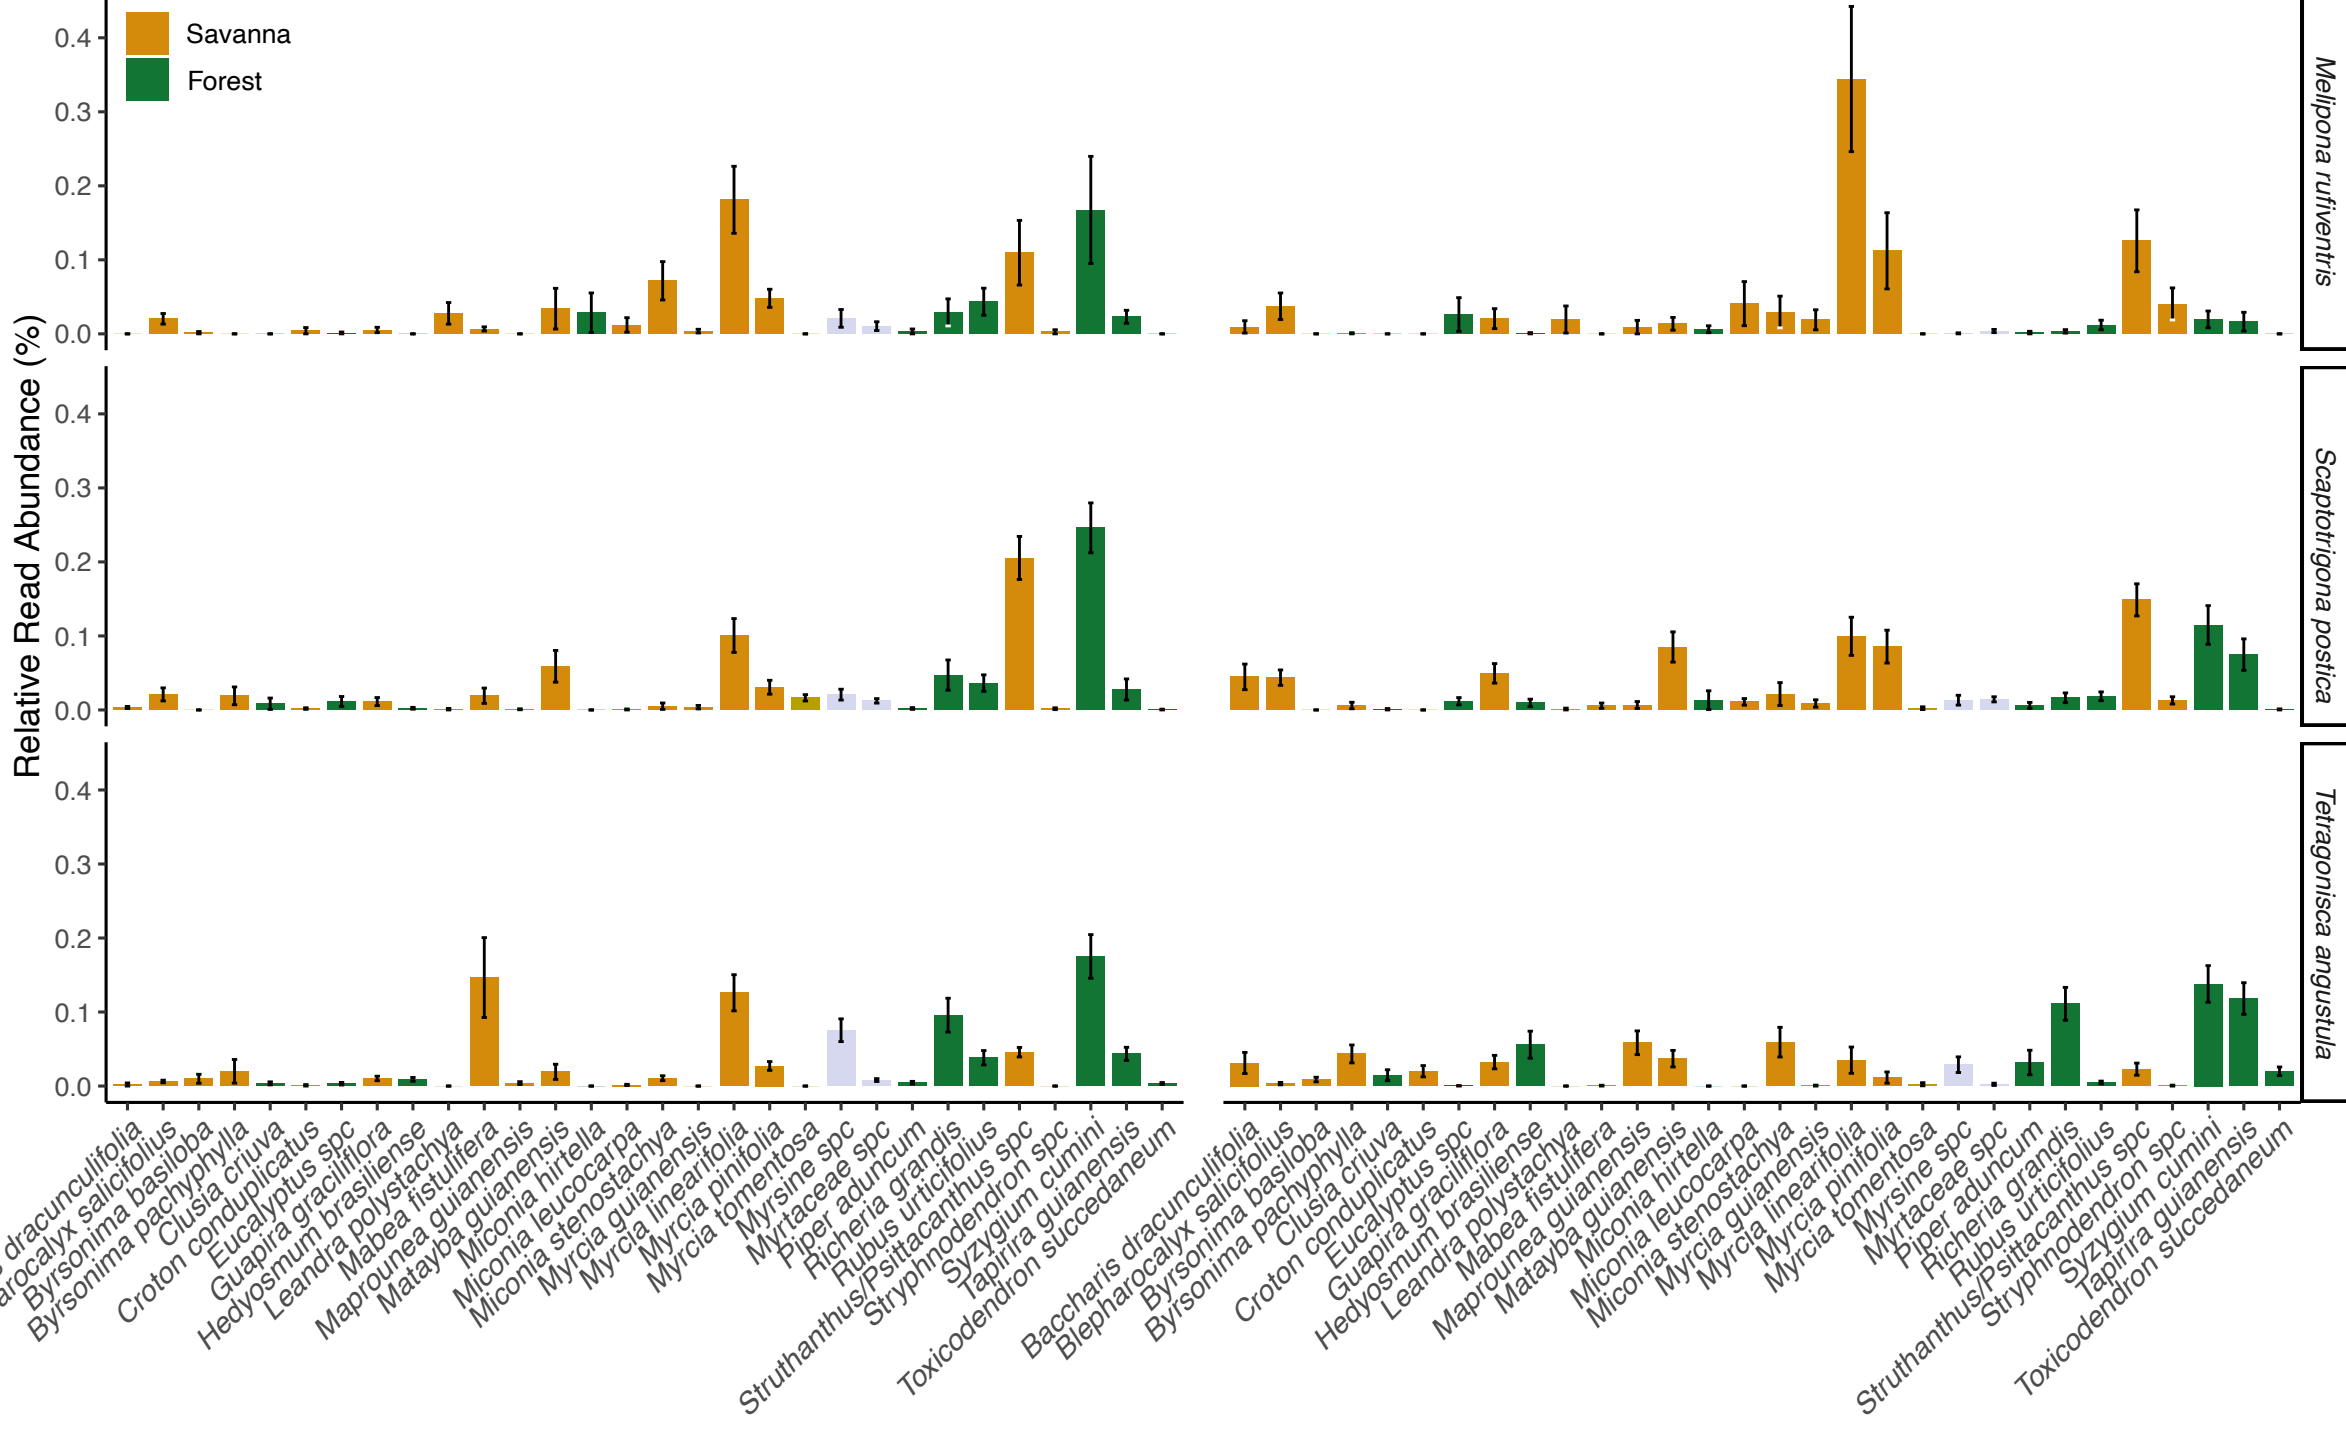

Melipona rufiventris

Scaptotrigona postica

Tetragonisca angustula
